# Supplementary material
Source: PubMed Central journal article supplement (PMC3529608)
Supplement: supp_cis566_cis566suppl1.pdf [file supp_cis566_cis566suppl1.pdf]

1 **Recommendations to the FDA for Interim Endpoints for Clinical**  
2 **Trials in Acute Bacterial Skin and Skin Structure Infections**  
3 **Foundation for the National Institutes of Health Biomarkers Consortium**  
4 **Project Team**  
5 **ABSSSI Docket ID: FDA-2010-D-0433**  
6

7 **Contents**

|    |       |                                                                                       |    |
|----|-------|---------------------------------------------------------------------------------------|----|
| 8  | 0     | Executive Summary .....                                                               | 2  |
| 9  | 1     | Introduction/Background .....                                                         | 3  |
| 10 | 1.1   | Introduction .....                                                                    | 3  |
| 11 | 1.2   | Regulatory Background .....                                                           | 4  |
| 12 | 2     | Summary of Project Team Process .....                                                 | 5  |
| 13 | 2.1   | Review of Historical Evidence and Medical Literature .....                            | 5  |
| 14 | 2.2   | Retrospective Data Analyses .....                                                     | 6  |
| 15 | 2.3   | Pre-existing Data .....                                                               | 6  |
| 16 | 3     | Core Data Elements Reviewed and Major Project Team Discussion Points .....            | 7  |
| 17 | 3.1   | Major Discussion Points .....                                                         | 7  |
| 18 | 3.1.1 | Clinical Trial Entry Criteria .....                                                   | 7  |
| 19 | 3.1.2 | Primary Efficacy Endpoint .....                                                       | 9  |
| 20 | 4     | Data Not Yet Available and Needed for Final Recommendations/Future Research Needs ... | 11 |
| 21 | 5     | Interim Recommendations .....                                                         | 13 |
| 22 | 5.1   | Study Design .....                                                                    | 13 |
| 23 | 5.2   | Endpoint Definition .....                                                             | 13 |
| 24 | 5.2.1 | Timing of Outcome Assessments .....                                                   | 13 |
| 25 | 5.2.2 | Needs—Future Research Goals .....                                                     | 15 |
| 26 | 5.2.3 | Comments on Key Study Enrollment Criteria .....                                       | 15 |
| 27 | 5.2.4 | Comments on Key Analysis Issues .....                                                 | 16 |
| 28 | 5.2.5 | Alternative Viewpoints .....                                                          | 17 |
| 29 | 5.2.6 | Additional Information Needed To Advance to Final Recommendations .....               | 19 |
| 30 | 6     | Conclusions .....                                                                     | 20 |
| 31 | 7     | Appendix—Clinical Trial Data .....                                                    | 21 |
| 32 | 7.1   | Cerexa, Inc., Data .....                                                              | 21 |
| 33 | 7.2   | Durata Therapeutics Data .....                                                        | 23 |
| 34 | 7.3   | Pfizer Data .....                                                                     | 24 |
| 35 | 8     | Project Team Members .....                                                            | 27 |
| 36 | 9     | References .....                                                                      | 28 |
| 37 |       |                                                                                       |    |

## 38 **0 Executive Summary**

39

40 During recent decades, the efficacy endpoints for Acute Bacterial Skin and Skin Structure  
41 Infections (ABSSSI) registrational studies relied on a clinical assessment of cure requiring  
42 “complete resolution of signs and symptoms” based on a combination of non-standardized,  
43 physician-based observations and comments collected from the patient by the physician as well  
44 as on the investigator’s assessment of the need for alternative antibiotic therapy. As non-  
45 inferiority clinical trial design advanced during the late 20<sup>th</sup> and early 21<sup>st</sup> century, it became  
46 apparent to the FDA and others that the development of more readily quantifiable, reproducible,  
47 and externally verifiable endpoints would improve the design of present-day non-inferiority  
48 clinical trials for ABSSSI.

49

50 In developing updated approaches to endpoints, it also was recognized that outcome measures  
51 used for studies that support drug registration for ABSSSI must be relevant for clinical practice.  
52 Although the level of detail and accuracy in measurement needed in the setting of clinical trials  
53 may differ from that needed in clinical practice, a description of the pivotal (Phase 3 or  
54 registrational) clinical trials as conducted is an integral part of the prescribing information and  
55 must be based directly on the trial data as collected and analyzed. The choice of primary  
56 endpoint for a trial may thus need to balance a variety of purposes.

57

58 In parallel discussions of the design of studies for Community-acquired Bacterial Pneumonia  
59 (CABP), the idea arose that standardized assessments of patient response in ABSSSI in the first  
60 few days of therapy might provide key insights into both drug effect and options for trial design  
61 (FDA 2010, August). Consequently, and at the request of the FDA, in early May 2010 the  
62 Foundation for the National Institutes of Health (FNIH) convened a Project Team for a  
63 Biomarkers Consortium Project, entitled “Developing Endpoints for Clinical Trials of Drugs for  
64 Treatment of Acute Bacterial Skin and Skin Structure Infections and Community-Acquired  
65 Bacterial Pneumonia (Phases 1 and 2).” The Project Team membership included broad  
66 participation from the NIH, the FDA, the academic research community (including members of  
67 the Infectious Diseases Society of America [IDSA]), and interested biopharmaceutical  
68 companies.

69

70 This document summarizes the work of the Biomarkers Consortium Project Team. Over a series  
71 of meetings, the group reviewed the available historical and modern data and found that control  
72 of lesion spread at 48 to 72 hours after randomization was sufficiently well documented that an  
73 early response endpoint measure could be proposed. To assess sustained response and other late  
74 events, supportive information should be obtained by assessing outcomes at a fixed time point  
75 after therapy has been completed. Such information could include a late response endpoint  
76 similar to the traditional test-of-cure (TOC) endpoint but more clearly defined. Although  
77 incompletely validated under the proposed conditions of use and requiring further research, an  
78 early response endpoint can be used to anchor a non-inferiority hypothesis in a trial for this  
79 indication. Thus, the Project Team supports a primary endpoint based on early response in  
80 review of registrational trials and approval of applications in ABSSSI while further research into  
81 outcomes at later time points in this area is conducted.

## 82 **1 Introduction/Background**

### 83 **1.1 Introduction**

84 Acute Bacterial Skin and Skin Structure Infections (ABSSSI) are common infections most often  
85 caused by *Staphylococcus aureus* (approximately 80%) and *Streptococcus pyogenes*  
86 (approximately 12%). The recent epidemiological shift to a greater proportion of ABSSSI caused  
87 by methicillin-resistant *S. aureus* (MRSA) acquired in the community—approximately 59% in  
88 one recent survey (Moran et al. 2006)—has been a cause for concern due to the limited number  
89 of safe and effective orally available antibacterial drugs for treatment of disease due to MRSA.  
90

91 New antibacterial agents for ABSSSI are thus important. In addition, new agents with Gram-  
92 positive activity are often initially tested and FDA-approved for use in skin and soft tissue  
93 infections prior to testing in more severe infections such as pneumonia. Over the past several  
94 decades, the efficacy endpoints for ABSSSI registration studies were determined by resolution of  
95 signs and symptoms of the infection at a time point after completion of the antibacterial drug  
96 therapy. As understanding of the principles underpinning conduct of non-inferiority clinical trials  
97 advanced during the late 20<sup>th</sup> and early 21<sup>st</sup> century, it became apparent to the FDA and others  
98 that the design of present-day non-inferiority clinical trials for ABSSSI would be improved by  
99 better defining outcome measures, reducing the dependence on subjective elements of endpoints  
100 to make outcome measures more reliable, and choosing the timing of outcomes at a point where  
101 prior evidences shows a reliable and reproducible drug effect to justify the use of the non-  
102 inferiority study design. It also became apparent to the FDA that to ensure the constancy of the  
103 effect of antimicrobials from prior trials and across current trials, a standard for measurement is  
104 needed. In developing updated approaches to endpoints, it was also recognized that outcome  
105 measures used for studies that support drug registration for ABSSSI must also be relevant for  
106 clinical practice. A description of the pivotal (Phase 3) clinical trials is an integral part of the  
107 prescribing information and is based directly on the trial data as collected and analyzed. Thus,  
108 the choice of primary endpoint for a trial needs to provide information to meet a range of  
109 purposes.  
110

111 These considerations led to the publication of a new FDA Guidance for studies in ABSSSI (FDA  
112 2010, August). This Guidance includes a focus on assessment of efficacy at the earlier time  
113 points. The FDA authors note that published data from the 1930s and 1940s provide historical  
114 evidence of substantial treatment effects at time points earlier than those used in recent non-  
115 inferiority trials. Specifically, the guidance points to historical data showing convincing and  
116 reliable antibacterial drug treatment effects early in the course of treatment at 48 to 72 hours after  
117 the initiation of antibiotic therapy for ABSSSI. This observation is of importance as a known  
118 treatment effect size on a well-defined and reliable outcome measure at a specific time point is  
119 essential for a non-inferiority trial design. However, the historical evidence is limited in that (1)  
120 the data are incomplete and cannot be audited; (2) the outcomes measured included recordings of  
121 body temperature, pulse, respiratory rate, and other clinical responses that are considered today  
122 to be biomarkers; and (3) questions exist as to whether the constancy assumption required for  
123 non-inferiority trial design can be met.  
124

125 Consequently, and at the request of the FDA, in early May 2010, the FNIH convened a Project  
126 Team with broad participation from the NIH, the FDA, the academic research community  
127 (including members of the IDSA), and interested biopharmaceutical companies to address these  
128 issues. The conclusions described within this document represent the work of the Project Team.  
129 Over a series of meetings, the group reviewed the historical literature and relevant recent  
130 publications, reviewed data from several available modern clinical studies, and discussed the  
131 merits and limitations of most of the well-known endpoints in the literature. The Project Team  
132 found that it was possible to suggest new endpoints using these data but that these endpoints  
133 were incompletely evaluated and further research is needed. Not all members of the team agreed  
134 that these novel endpoints should be considered for use as primary endpoints in ABSSSI non-  
135 inferiority trials, but the Project Team did agree that the new endpoint provided clarity regarding  
136 an objective way to describe the early assessment of clinical response that has been an integral  
137 part of the investigator-based decision to continue study therapy.

138  
139 Given the urgency of the situation with respect to new antibiotic development, the Project Team  
140 is submitting this report containing its recommendations to the FDA regarding the definition and  
141 timing of interim or “bridging” primary endpoints suggested for immediate use as primary  
142 endpoints in registrational clinical trial protocols with the potential to support approval of  
143 applications in ABSSSI, concomitant with exploratory research to develop improved endpoints.

144  
145 This initiative is particularly important at a time when the incidence of treatment-resistant  
146 pathogens such as MRSA and many Gram-negative bacilli is increasing, as has been highlighted  
147 by the IDSA (Boucher et al. 2009).

## 148 **1.2 Regulatory Background**

149 In the United States the regulatory standard for approval of drugs is “substantial evidence” from  
150 “adequate and well-controlled trials.” One of the requirements for adequate and well-controlled  
151 trials is that the methods of the assessment of subjects’ response must be “well-defined and  
152 reliable.” U.S. regulations require three components for well-defined and reliable outcomes  
153 measures (21CFR314.126(b)(6)): The study should explain (1) the variables measured (what to  
154 measure), (2) the methods of observation (how the outcome was measured), and (3) the criteria  
155 used to assess response (how the data are analyzed to define a meaningful outcome; e.g., what  
156 defines a “responder”).

157  
158 U.S. regulations as well as a recent Institute of Medicine document (Micheel and Ball 2010)  
159 point out that a “clinical” outcome measure is a direct measure of how patients feel, function, or  
160 survive (21CFR314.500, Subpart H). However, when appropriately developed and evaluated,  
161 surrogate endpoints may provide valuable insight and can also be used as outcome measures to  
162 support drug approval provided a clinical trial shows that “the drug product has an effect on a  
163 surrogate endpoint that is reasonably likely, based on epidemiologic, therapeutic,  
164 pathophysiologic, or other evidence, to predict clinical benefit” (21CFR314.510) and followup  
165 studies show the benefit on the surrogate reflects the benefit on direct patient-centered outcomes.  
166 “Surrogate endpoints” are biomarkers, such as signs of disease, radiological tests, cultures, and  
167 laboratory values, that act as substitute and indirect measures for how patients feel, function, or  
168 survive. In the case of trials of anti-infective agents, acute symptoms of an infection (warmth,

169 chills, pain), objective local findings (erythema, swelling), and selected markers of systemic  
170 response (leukocytosis, shift in white blood cell population distribution, hypotension) all have a  
171 well-established mechanistic link to the triggering infection (triggering of innate immunity  
172 cascades by microbial surface components (Dieffenbach, Tramont et al., 2010), release of  
173 cytokines by leukocytes activate in response to microbial pathogens (Nauseef and Clark, 2010).  
174 Although changes in these surrogate endpoints may have other causes, physicians rely on these  
175 measures in clinical practice. The group agreed that in the specific case of ABSSSI there is an  
176 observed linkage between control of lesion spread and patient-centered outcomes such as pain.  
177 The group agreed that evaluation of the relationship of various outcomes in ABSSSI is a key  
178 focus of future planned research.

179  
180 In the setting of non-inferiority trials, U.S. regulations (21CFR214.126(b)(2)(iv)) point out that if  
181 the intent of the trial is to show similarity of the test and control drugs (non-inferiority), the  
182 report of the study should assess the ability of the study to have detected a difference between  
183 treatments. The analysis of the study should explain why the drugs should be considered  
184 effective in the study; for example, by reference to results in previous placebo-controlled studies  
185 of the active control drug (21CFR314.126(b)(2)(iv)). To assess the “assay sensitivity” of a trial  
186 to detect differences in the setting of non-inferiority trials, international guidance (International  
187 Conference on Harmonization Efficacy Guidelines E-9 and E-10) as well as recent FDA general  
188 and anti-infective guidances point out that the planned non-inferiority trial should have similar  
189 definitions of disease, outcomes measures, and timing of outcome measures to those used to  
190 show the effect of the control drug in prior superiority trials. The effect of the control drug  
191 compared to placebo or no specific treatment should be quantifiable, as well as reliably and  
192 reproducibly shown in prior studies.

## 193 **2 Summary of Project Team Process**

194 The members of the Project Team convened a series of meetings in May and June 2010 and  
195 January and July 2011. Over the course of these meetings, the group discussed the historical  
196 literature, recent publications on measurement of skin lesions, and data from several available  
197 modern clinical studies. The group reached consensus on a process to identify primary and  
198 secondary endpoints for ABSSSI and CABP (the latter discussed separately).

### 199 ***2.1 Review of Historical Evidence and Medical Literature***

200 The past evidence consisted of two trials published in 1937 in the British Medical Journal by  
201 Snodgrass and Anderson. These trials compared sulfa drugs to ultraviolet light in patients with  
202 erysipelas. The studies were not randomized (used alternate assignment) and not blinded. The  
203 investigators evaluated a number of outcome measures including cessation of lesion spread,  
204 duration of pyrexia, duration of toxemia, death, relapse, and complications. The greatest  
205 treatment effect upon which to base a non-inferiority trial was on cessation of lesion spread at 48  
206 hours. A meta-analysis of the treatment effect of the combined data from the two studies on  
207 cessation of spread at 48 hours showed an overall difference of 24% in favor of sulfa drugs with  
208 a 95% confidence interval of 18.2% to 30.0%. The Snodgrass and Anderson studies do not  
209 present a specific definition of lesion size, how the lesions were measured, or how much change  
210 in lesion size was considered meaningful in analyzing outcomes. The study states, “The local  
211 lesion was considered with regard to its site, extent, swelling, painfulness and tenderness.”

212  
213 If deaths and patients who failed on initial therapy are included in the analysis, the meta-analysis  
214 at 48 hours shows an overall difference of 26% in favor of sulfa drugs with a 95% confidence  
215 interval of 19.0% to 33.5%. While there was a treatment difference on duration of pyrexia and  
216 although body temperature is a biomarker that is often linked to the infection, these studies were  
217 performed before the introduction of antipyretics into clinical practice, and analysis of modern  
218 studies might be confounded by the widespread use of drugs or drug combinations with  
219 antipyretic properties. Thus, incorporation of the resolution of elevated body temperature into a  
220 response measure was not further analyzed. There were no differences in death, relapse, or  
221 complications at early or later time points upon which to base the design of future non-inferiority  
222 studies.

223  
224 The Project Team agreed that the data from Snodgrass and Anderson on control of lesion spread  
225 are a useful starting point for further investigation and could be assessed by photographic  
226 recording. The Project Team performed a review of the medical literature evaluating current  
227 measurement techniques used to measure skin lesions and their associated variability. There  
228 were no articles specifically addressing the measurement of lesion size in cellulitis. The majority  
229 of the articles are focused on measuring the chronic wound healing process. The studies  
230 comparing various measurement techniques on wound models including length and width or area  
231 measurements with a ruler showed relative biases of between 38% and 60% compared to a  
232 coordinate measuring machine (CMM) with an absolute accuracy of 0.0002 inches (Langemo et  
233 al. 1998). The studies were performed on plaster of Paris models so error might be greater in the  
234 clinical setting where patient position, lesion flexibility, and definitions of lesion boundaries  
235 might be encountered. The measurement characteristics and reliability and reproducibility of  
236 various techniques in the measurement of ABSSSI lesions remain unknown.

## 237 **2.2 Retrospective Data Analyses**

238 The Project Team performed retrospective analyses of datasets from existing clinical studies to  
239 a) refine currently proposed outcome measures by evaluating their operational characteristics,  
240 changes over time, and responsiveness to change at specific time points in a modern clinical trial  
241 setting and; b) help identify additional endpoints or biomarkers that might be relevant. The  
242 Project Team has identified several sources of data from existing modern industry clinical trials  
243 that have been used as an in-kind contribution to the project. These analyses, which have also  
244 been contributed in-kind to the project, have been based in each case on a statistical analysis plan  
245 (SAP) drafted by qualified biostatisticians who are part of the Project Team; each SAP was  
246 shared with the entire Project Team for comment and approval prior to initiating the analyses.

## 247 **2.3 Pre-existing Data**

- 248 1. Cerexa, Inc. (a subsidiary of Forest Laboratories) generously provided the FDA-requested  
249 analyses from the following two registrational clinical trials:
  - 250 a. NCT00633152: A Phase III Study of the Efficacy and Safety of Ceftriaxone Versus  
251 Vancomycin plus Aztreonam in Subjects With Complicated Skin and Skin Structure  
252 Infection

- 253 b. NCT00424190: A Phase III Study of the Comparative Study of Ceftaroline vs.  
254 Vancomycin plus Aztreonam in Adult Subjects With Complicated Skin Infections  
255 (cSSSI)
- 256 c. Publication: Corey GR, Wilcox M, Talbot GH, et al. Integrated analysis of CANVAS 1  
257 and 2: phase 3, multicenter, randomized, double-blind studies to evaluate the safety and  
258 efficacy of ceftaroline versus vancomycin plus aztreonam in complicated skin and skin-  
259 structure infection. Clin Infect Dis 51(6): 641-50.
- 260 2. Durata Therapeutics generously provided the primary data tables from the clinical trial  
261 referenced in the following publication (note: this clinical trial is not listed on  
262 clinicaltrials.gov):
- 263 • Publication of a Phase III Study: Jauregui LE, Babazadeh S, Seltzer E, et al.  
264 Randomized, double-blind comparison of once-weekly dalbavancin versus twice-daily  
265 linezolid therapy for the treatment of complicated skin and skin structure infections. Clin  
266 Infect Dis 41(10): 1407-15.
- 267 3. Pfizer generously provided the primary data tables from the following clinical trial:
- 268 • NCT00087490: A Phase IV Study of Skin Structure Infections With Suspected or Proven  
269 Methicillin-Resistant *Staphylococcus aureus* (MRSA).
- 270

271 The Project Team conducted analyses of these datasets in a post hoc subgroup of all randomized  
272 patients defined by criteria similar to those used for inclusion in current clinical trials of  
273 antimicrobials for ABSSSI. The purpose of the analysis was to provide descriptive data of the  
274 lesion size in skin infections over the course of treatment and to assist in determining the  
275 definition of control of lesion spread in skin infections. Analyses provided descriptive statistics  
276 (mean, standard deviation, median, minimum and maximum value for continuous data, and  
277 number and percentages for dichotomous and ordinal data) and graphical depictions of summary  
278 data. No inferential statistical analyses (i.e., hypothesis testing) were completed. and thus,  
279 statistical power was not determined for this analysis. The Project Team agreed that the analyses  
280 developed from these studies are specific to the specific context of use evaluated in these studies.

## 281 **3 Core Data Elements Reviewed and Major Project Team** 282 **Discussion Points**

### 283 **3.1 Major Discussion Points**

#### 284 **3.1.1 Clinical Trial Entry Criteria**

- 285 1. *Lesion size.* An initial lesion with sufficient size to permit demonstration of resolution is  
286 required. The Project Team generally agreed that the FDA's proposed criterion of  $\geq 75$  cm<sup>2</sup>  
287 of cellulitis (erythema/redness, edema, or swelling) in adults was adequate. However, the  
288 Project Team found that defining lesion size based on erythema alone was the simplest way  
289 to provide a clear definition at our current state of knowledge. Future work could address  
290 inclusion of measures of edema or induration, but defining the edge of these processes is  
291 problematic at present for purposes of lesion size definition. Although smaller lesions are  
292 relevant in some clinical settings, the group estimated that measuring change with larger  
293 lesions would be more accurate. Some studies have included lesions as small as 1 cm<sup>2</sup>, but  
294 the Project Team agreed that measurement of such small lesions would be challenging in

295 terms of reliability and reproducibility. The Project Team noted that for small adults and  
296 pediatric populations, ABSSSI may produce lesions that are proportionately relevant but that  
297 are too small to meet specific size criteria. Suitable age- and site-specific data do not exist on  
298 which to recommend a size-based assessment for cellulitis in these populations.

299 2. *Systemic signs.* There is currently uncertainty and inconsistency on how to define disease  
300 severity. The Project Team agreed that use of systemic inflammatory response syndrome  
301 (SIRS) criteria (heart rate, respiratory rate, blood pressure, white blood cell count) could  
302 provide useful supporting evidence that enrolled subjects have sufficient severity of illness.  
303 The Project Team agreed that SIRS criteria should not be a requirement at enrollment, and  
304 the group did not decide upon specific definitions for severity. It will be important to  
305 examine this in further studies.

306 a. *Elevated body temperature.* Consensus was to not include elevated body temperature as  
307 either a baseline requirement for enrollment or as part of a primary outcome measure for  
308 the following reasons:

309 i. There are challenges in measuring body temperature in a well-defined and reliable  
310 manner

311 (1) There is no consensus on the definition of fever. Hence, it is preferable to use the  
312 term “elevated body temperature.” When examining elevation in body  
313 temperature, there is no single threshold used to define fever. A measurement of  
314 38.0 °C is often thought acceptable, but there is no evidence or criteria available to  
315 support this particular criterion. Further, several methods exist for measuring  
316 body temperature at various anatomic sites (mouth, rectum, axilla, tympanic  
317 membrane, temporal artery); selecting and standardizing the best method for  
318 research studies will require further study.

319 (2) The optimal frequency of temperature measurement is uncertain. There are no  
320 data in the medical literature on which to base a requirement for the frequency of  
321 measurements. Insufficiently frequent measurements may miss key events, but  
322 overly frequent measurements would create needless logistical difficulty.  
323 Moreover, measurement of temperature during a preset window can be  
324 particularly difficult in a clinical setting where most patients are not hospitalized  
325 and where measurements are to be recorded by the patient at home in a patient  
326 diary, leading to missing data that can translate in a programmatic failure outcome  
327 in an intent-to-treat (ITT) analysis set.

328 (3) Missing data will contribute unnecessarily to higher failure rates when missing  
329 data are coded as failures of therapy. While the FDA draft ABSSSI guidance  
330 recommends four body temperature measurements within the 48- to 72-hour visit  
331 window, there is a risk that outcomes will be driven by the ability to gather all  
332 required measurements rather than by drug effect.

333 ii. A requirement for elevated body temperature at enrollment will exclude many  
334 vulnerable and important-to-treat populations, such as the elderly, diabetics, and other  
335 patients who are immunocompromised. Such patients may not have elevated body  
336 temperature at baseline despite documented skin infection.

337 iii. Elevated body temperature is not an effect modifier. Analysis of data from the  
338 ceftaroline studies showed that elevated body temperature is a predictor of response  
339 (i.e., lower success rates in patients with, than in those without, elevated body  
340 temperature when this sign is part of the endpoint) but not an effect modifier; i.e., the.



- 341 difference between test and control groups was not substantially different in the  
342 presence versus the absence of elevated body temperature.
- 343 iv. Concomitant antipyretics and anti-inflammatory agents can confound the assessment  
344 of the course of elevated body temperature. Many combinations of antipyretics and  
345 analgesics are available as over-the-counter medications in multiple presentation  
346 forms.
- 347 v. Elevated body temperature is not on the causal pathway of the disease.
- 348 3. *Local signs and symptoms.* The Project Team agreed that other local symptoms and signs  
349 such as assessments of dolor (pain), tumor (swelling and induration), calor (warmth), and  
350 drainage would provide useful information but need not be part of the primary outcome  
351 measure. Approaches to reliable definition and measurement of these variables would require  
352 further study. Also, needed are clear definitions of abscess vs. cellulitis vs. wound infection.  
353 When quotas on maximum number or percentage of a given clinical syndrome are to be  
354 enrolled, it is essential to have clear definitions of each category of syndrome.

### 355 **3.1.2 Primary Efficacy Endpoint**

- 356 1. Two components of the primary endpoint were proposed initially, prior to examination of the  
357 clinical trial data.
- 358 a. “Control of lesion spread” at 48 hours relative to the previous measurement at 24 hours;  
359 and
- 360 b. Percent change from baseline, with the change not being more than “x” percent, where  
361 “x” could be a positive or negative number, to be determined.
- 362 2. The first criterion was based on the recognition that a condition for “success” in a “control of  
363 lesion spread” endpoint at 48 hours is that the lesion sizes should not still be increasing  
364 during the previous 24 hours; i.e., between 24 and 48 hours.
- 365 3. The second criterion was included because maintaining the integrity of randomization is of  
366 integral importance in causal efficacy assessments. To be specific, an assessment of  
367 treatment effect cannot be based solely on a change between 24 hours and 48 hours because  
368 the 24-hour value is influenced by treatment assignment. Change from baseline preserves the  
369 integrity of randomization and prevents selection bias. Note that by choosing “x” to be a  
370 negative number, a case where a modest-to-large increase in lesion size occurs in the first 24  
371 hours could be a success only if an even larger reduction in lesion size occurs between 24  
372 and 48 hours.
- 373 4. After “x” was chosen to be -20%, available studies were analyzed regarding the patterns of  
374 change at 24 and 48 hours. In these analyses, for subjects in whom the 48-hour lesion size  
375 showed a  $\geq 20\%$  decrease from baseline (i.e., subjects in whom criterion 1.b is satisfied),  
376 there were very few having an increase in lesion size between 24 and 48 hours; i.e., few in  
377 whom criterion 1.a is not satisfied. Hence, because validity of the second criterion almost  
378 always implies validity of both criteria, it was recognized that it was not necessary to state  
379 the first criterion. Because it is sufficient to assess only the second criterion, a criterion based  
380 solely on the change from baseline at 48 hours, the need to perform a 24-hour assessment  
381 was eliminated. This decision should enhance trial integrity by reducing the level of missing  
382 data in the assessment of the primary endpoint.
- 383 5. A goal of trials is to maintain the ability to detect clinically meaningful differences between  
384 drugs. High success rates (on the order of 90%-95%) may make it more difficult to evaluate

385 assay sensitivity and may require smaller non-inferiority margins. Therefore, success rates in  
386 the 80-85% range better enable the detection of a drug benefit. When the primary endpoint of  
387 a clinical trial is a dichotomous outcome of response vs. non-response in settings where the  
388 metric used for the primary analysis of the primary endpoint is the absolute difference in  
389 response rates (rather than the odds ratio), it usually is difficult to ensure the integrity of a  
390 non-inferiority analysis if the response rate on the active control arm is extreme, such as in  
391 the range of 95%. This is especially true when there is some subjectivity in the assessment of  
392 that endpoint even when outcome assessments are blinded and when clinicians or evaluators  
393 are instructed or guided in a manner that patients are called a success. Settings where there  
394 is some uncertainty, or where enrollment is focused on those participants highly likely to be  
395 called a success, or where one allows prior or concomitant antibiotics or other interventions  
396 as ancillary treatments further increase the likelihood of success. In such settings, if absolute  
397 non-inferiority margins such as 10% are used, there is an unacceptable likelihood that such  
398 margins would be ruled out even for an ineffective or inadequately effective intervention that  
399 has a failure rate that truly is two- to four-fold higher than that of the active control. The  
400 solution in such settings would be to have endpoint definitions, patient selection, and trial  
401 conditions such that the expected success rate on the active control is considerably less than  
402 95%, or by use of an odds ratio metric for the analysis of treatment effect, or by using an  
403 absolute difference metric with a properly conservative non-inferiority margin. Defining  
404 outcomes such that success rates using a pre-specified definition of success are in the 80% to  
405 85% range in ABSSSI trials would help control for this potential source of error in non-  
406 inferiority trials while maintaining feasibility of conducting these trials by avoiding  
407 prohibitively large sample sizes, but does have the drawback that each future trial would  
408 have a different percent reduction in lesion spread as its response definition.

- 409 6. Consensus was that elevated body temperature is not required at baseline (as above), though  
410 resolution of elevated body temperature could be evaluated as a safety concern; i.e., as was  
411 done in evaluation of inhaled aztreonam in cystic fibrosis patients. Elevated body  
412 temperature can have many causes including drug fever, an instance in which the patient may  
413 be cured but have an adverse event.
- 414 7. The Project Team agreed on the need to assess the “total picture” of the patient at a late  
415 endpoint. The group discussed that the variables measured at later time points need to be  
416 specifically defined and that the components of this total picture and “overall pattern of  
417 response” should be specified. The group did not discuss specific definitions but agreed that  
418 drug sponsors should discuss definitions of measurements at later time points with the FDA.  
419 Some points of discussion regarding the definition of a late endpoint included the following:
- 420 a. The FDA has pointed out that clinical endpoints, defined as those that directly measure  
421 how the patient “feels, functions, or survives,” are important and required by regulation.  
422 Mortality is an important component of any outcome measure, but it is low in ABSSSI  
423 trials. Thus, effects on how patients feel and function would drive the overall analysis.
- 424 b. From the Snodgrass data, there is a concern that if one evaluates response later in the  
425 natural history of disease, evaluated in their two studies during or after receipt of an  
426 intervention, success can be observed with an ineffective treatment given that the  
427 treatment difference between antimicrobial and the control group decrease over time.  
428 Thus, success rates that are similar between two active drugs “early” may reflect  
429 treatment effects of antimicrobials relative to placebo, whereas success rates that are

- 430 similar “late” may be consistent with the natural history of resolution of the illness based  
431 on the available data in the Snodgrass trials.
- 432 c. The group agreed that outcomes measured at a fixed time point post-randomization are  
433 important to evaluate sustained early response as well as other outcomes of interest.  
434 These measurements should be specifically defined and noted in the product labeling;  
435 e.g., Table 9, Teflaro (ceftaroline fosamil) US Prescribing Information, October 2010.
- 436 8. Collection of sufficient pharmacokinetic (PK) data to estimate individual subject drug  
437 exposure would allow for more complete exposure-response analyses for both early and late  
438 endpoints.

#### 439 **4 Data Not Yet Available and Needed for Final** 440 **Recommendations/Future Research Needs**

441 The Project Team proposed the suggested outcome measures noted above for use by sponsors as  
442 outcomes for registrational trials in ABSSSI. These outcome measures are intended as  
443 “bridging” measures for ongoing or currently planned clinical trials while gathering more  
444 information on outcome measures in ABSSSI. The Project Team noted that the currently  
445 available data leave substantial gaps in the evidence base in terms of issues related to enrollment  
446 criteria, determining severity of disease, and which baseline factors are effect modifiers. Some of  
447 the other outstanding issues are noted above, including evaluating the quantitative relationship  
448 between control of lesion spread and how patients feel and function and the validity, reliability,  
449 and reproducibility of the methods used to assess outcomes in ABSSSI. While there is an urgent  
450 need to decide on bridging endpoints for the short-term future, it is important to note that these  
451 suggestions are a bridge and not final, evidence-based enrollment criteria or outcome measures.  
452 There is an equally urgent need for prospective research studies to address these outstanding  
453 questions as discussed in the following section. Any final recommendations should be based on  
454 evidence from studies and not opinion based.  
455

456 To address these gaps, a qualitative research phase has been proposed by the Project Team. The  
457 proposal includes use of one or more research firms selected through a formal RFP process to  
458 complete a qualitative research phase of instrument development—involving both literature  
459 searches and patient interviews—to begin the process of developing well-defined and reliable  
460 outcome measures that may be used in clinical trials in ABSSSI. The goal of these studies would  
461 be to address the research gaps noted in the retrospective data analysis stage of this project. The  
462 proposed studies will be conducted by a group of researchers highly experienced in the field of  
463 infectious diseases and will be guided by a Project Team that includes academic clinicians, drug  
464 development personnel from pharmaceutical companies, and representatives from the NIH and  
465 the FDA.  
466

467 Results from the retrospective clinical trial analyses and qualitative research studies will be used  
468 as input to designing prospective clinical studies to be conducted as part of a potential third  
469 phase of this project, which would be proposed as a separate Biomarkers Consortium project and  
470 be focused on the design and conduct of one or more clinical studies to further test and validate  
471 specific endpoints and measurement approaches. While a standalone study cannot be ruled out, it  
472 is expected that these later studies will be able to be coordinated as companion or exploratory  
473

474 studies to current trials being conducted by the National Institute of Allergy and Infectious  
475 Diseases or industry.

476

477 Remaining challenges to be addressed in future research are listed below:

- 478 1. There is a need for evidence on what are the most well-defined, reliable, reproducible, and  
479 feasible methods for measuring efficacy outcomes in ABSSSI trials.
- 480 a. Develop an endpoint model for ABSSSI.
  - 481 b. Capture data on the outcomes most important to defining treatment benefit (how patients  
482 survive, feel, and function) .
  - 483 c. Develop and qualify well-defined, reliable, and reproducible outcome assessments for  
484 each targeted patient population. The outcome assessments developed should include:
    - 485 i. Development and evaluation of patient-reported outcome (PRO) assessments of  
486 symptoms and signs that the patient can best observe and report; and
    - 487 ii. Development and evaluation of observer-reported outcome assessments of signs for  
488 use when patients cannot respond for themselves (e.g., pediatrics).
  - 489 d. Develop and evaluate clinician-reported outcome assessments of signs that require  
490 clinical examination and interpretation.
- 491 2. Improved methods to measure lesion size are needed.
- 492 a. Alternative ways to define the boundaries of the lesion could be considered. As noted  
493 above, the Project Team found that visible erythema was the most straightforward  
494 approach and that this was representative of the type of data available for analysis. The  
495 group agreed that the data analyzed were specific to the context of use in evaluated  
496 studies. Other approaches in other setting may be appropriate, and drug sponsors can  
497 discuss these with the FDA.
  - 498 b. Future studies should evaluate how to measure other variables including edema and  
499 induration as well as erythema.
  - 500 c. Approaches to computing lesion size based on simple length or width measurements must  
501 be clarified.
  - 502 d. Variations in measurement methods for obtaining length and width assessments of lesion  
503 sizes have not been characterized.
  - 504 e. Analyses comparing outcomes based on area vs. those based on separate decrease in  
505 length and width analyses would be helpful. This type of data was presented for linezolid  
506 but not for the ceftaroline and dalbavancin datasets.
- 507 3. Evaluation of lesion size in different populations and anatomic sites is needed. There may be  
508 instances where lesions, depending on anatomical sites or type of clinical syndromes, may  
509 decrease in size at different rates. This complexity requires further investigation as there were  
510 no data presented based on outcome by anatomical site. Moreover, these observations only  
511 reflect what is viewed on the surface and not the depth of the lesion that is present.
- 512 4. No prospectively collected data are available from pediatric trials. Analyses of enrollment  
513 criteria and outcomes based on anatomic site and in various pediatric populations (newborns,  
514 infants, and children) would be helpful as minimum lesion sizes of  $> 75 \text{ cm}^2$  do not apply in  
515 these populations.
- 516 5. The relationship of how patients feel, function, or survive to a reduction in lesion size from  
517 baseline is unknown. An area for future research would be to evaluate the quantitative  
518 relationship between effects on measures of patient symptoms and function and effects on  
519 signs of disease like control of lesion spread.

- 520 6. Currently, there are no valid instruments to measure disease severity (defined as baseline  
521 variables that predict outcomes) in ABSSSI. Lesion size may not be the only relevant  
522 measure of disease severity in either adults or pediatric populations. Variables such as body  
523 temperature may be a component of measurements of severity at baseline but are not  
524 suggested as post-baseline measures or as a primary outcome measure. Future research is  
525 needed to develop and evaluate severity measures for ABSSSI.
- 526 7. Clear definitions of each disease syndrome (cellulitis, abscess, wound) are needed given the  
527 overlap among clinical syndromes.
- 528 8. Effect of timing window on outcomes (are there differences in outcome within the 48 to 72  
529 hour assessment window?) and evaluation of time to response are needed.
- 530 9. Definition and development of outcome measures for late time point assessments are needed,  
531 including later measurements of lesion size as well as other measures that reflect how  
532 patients feel and function.

## 533 **5 Interim Recommendations**

### 534 **5.1 Study Design**

- 535 1. Most studies comparing one active agent with another would utilize a non-inferiority study  
536 design due to ethical and feasibility issues. The Project Team's discussion was based on the  
537 presumption of outcome measures used in the setting of non-inferiority trials.
- 538 2. Superiority trials do not have a requirement for prior evidence of drug effect and therefore  
539 have greater choice in outcome measures. These are not discussed here.

### 540 **5.2 Endpoint Definition**

- 541 1. *Lesion area.* Success will be defined as a  $\geq 20\%$  decrease in lesion area (defined as longest  
542 head-to-toe length times longest perpendicular width) versus baseline in adults. This primary  
543 endpoint was defined based on the available study data, and the Project Team acknowledges  
544 that other responder criteria may be relevant depending on the context of use.
- 545 2. An alternate endpoint of a variable percent change that is chosen based on a pooled response  
546 rate of 80% is an option that requires further research and review.
- 547 3. *Body temperature.* Absence of elevated body temperature (fever) should not be a component  
548 of the primary outcome measure because it is not on the causal pathway of the disease and  
549 temperature measurements cannot be obtained reliably in outpatients.

#### 550 **5.2.1 Timing of Outcome Assessments**

##### 551 Early Assessment

- 552 1. Success should be determined at 48-72 hours after randomization, with a strong  
553 recommendation that baseline measurement and administration of the first dose of study  
554 drugs occur as close to randomization as possible.
- 555 2. Notably, the historical data on which the 48- to 72-hour recommendation is based provided  
556 the collection day, not the hour; therefore, this proposed timeframe is an area for further  
557 investigation.

558  
559 This assessment is made independent of treatment decisions made by the investigator. The  
560 proposed early endpoint serves to link to the historical evidence of drug effect in previous studies

561 required in the design of non-inferiority trials. The classification of response or failure is also  
562 independent of study events other than death—institution of other therapy, unplanned surgical  
563 drainage, and adverse events are not counted as part of the early response classification. These  
564 measures can be captured as part of supportive information. Patients can continue on study drugs  
565 even if classified as an early non-responder in a post hoc early analysis or could be withdrawn  
566 from study drugs even if classified as an early responder.

567  
568 Challenges of the Early Assessment include the following:

- 569 • The historical data generated by Snodgrass et al. are not auditable.
- 570 • Conclusions are based on post hoc subgroup analyses.
- 571 • Substantial amounts of missing data from some of the studies.
- 572 • There were differences in the ways patients were treated between trials.
- 573 • Comparators for new trials will be drugs approved using the older paradigm
- 574 • Analyses accounting for anatomic site comparing outcomes using a decrease in area of the  
575 lesion compared to a decrease in both length and width measurements are not available; this  
576 requires further research.
- 577 • While the group agreed there is an observed relationship between control of lesion spread  
578 and other measures of disease outcomes (e.g., decrease in pain or other signs of disease),  
579 there were no quantitative analyses of the relationship of these outcomes to each other over  
580 time; this requires further research.
- 581 • There is a presumed link between the biomarker of erythema and the course of the infectious  
582 process (or, at least, to the related inflammatory process), but erythema is not the cause of the  
583 infectious process, nor is local infection the only cause of erythema.
- 584 • The definitions of lesions and methods of measurement in the historical datasets were not  
585 defined.

### 586 587 Later Assessment

- 588 1. The Project Team agreed that longer term efficacy outcome measures at specified time points  
589 in both test and control groups at end of therapy (EOT) and long-term followup are of  
590 essential relevance to clinicians and their patients. The FDA recognizes this as well and has  
591 included these data in the ceftaroline prescribing information.
- 592 2. Evaluation of sustained early control of lesion spread at a later time point is critical, and  
593 other clearly defined assessments of how patients feel or function across the entire period  
594 from onset to resolution of the process are critical. However, defining components of later  
595 time points requires further investigation and development. In the meantime, sponsors should  
596 propose to the FDA what and when they plan to measure at later endpoints.

597  
598 The Project Team suggested later assessments to evaluate sustained response on the initial  
599 control of spread achieved at 48-72 hours after the first dose of study medication. This may be  
600 measured by assessing change from baseline at later time points on control of lesion spread,  
601 assessments of other measures of how patients feel and function, and adverse events.

- 602 • Assessments at later time points can provide information on sustained early response. The  
603 late endpoint should occur at a fixed time point relative to day 1 and examine sustained  
604 response.
- 605 • The later time points could be two, preferably fixed, time points; one at the EOT (e.g., 7-10  
606 days following randomization) and the other at an off-therapy time point; e.g., 14-21 days

607 following randomization. The exact time point post-therapy should be determined depending  
608 on the maximum length of treatment and the PK/pharmacodynamic (PD) characteristics of  
609 the drug but should be the same time point in both test and control groups.

610 • This assessment should incorporate a continued measurement of lesion size using the same  
611 methods as earlier measures used at baseline and at the 48-72-hour measurement. The lesion  
612 should be stable over a period of 2 days with no increase in lesion size that exceeds a  
613 threshold percent change pre-specified in the protocol. The finding of sustained response  
614 should be accompanied by stability in vital signs including absence of elevated body  
615 temperature. If sponsors wish to perform a late assessment, they would examine sustained  
616 response in the entire population, not just in the population with initial early response. This  
617 late assessment should be based on the primary lesion; a distant site infection is considered a  
618 post-baseline event that should be captured and reported. The Project Team notes that more  
619 research is needed in this area regarding defining “cure” in skin abscess; in particular, for  
620 defining an appropriate threshold for reduction of lesion size defined as primary lesion size  $\leq$   
621  $x\%$ , the percent change threshold defined in the protocol in relation to the baseline value and  
622 no new lesions.  
623

## 624 **5.2.2 Needs—Future Research Goals**

625 The exact definition of sustained response for a later time point remains to be determined, as a  
626 reduction in lesion area of more than 20% may be necessary to be considered successful once  
627 subjects have stopped study drug.

- 628 1. Later time points could assess other variables in addition to sustained response. The group  
629 did not discuss specific definitions for later outcome assessments. The group agreed that  
630 sponsors should discuss definitions with the FDA for individual protocols.
- 631 2. The Project Team suggested several ways of incorporating the late time point into the overall  
632 analyses of study results. These analyses are not conflicting approaches and rely on  
633 demonstrating non-inferiority at the early time point as the anchoring assessment for  
634 purposes of ensuring assay sensitivity in the setting of non-inferiority study designs. Studies  
635 should capture information at both early and later time points to enable performing analyses  
636 such as:
  - 637 a. Demonstration of non-inferiority at the early time point with descriptive information only  
638 on later time points. Approval would be based on non-inferiority at the early time points  
639 with descriptive information in labeling related to later time points; or
  - 640 b. Demonstration of non-inferiority at the early time point with a pre-specified hypothesis  
641 related to superiority at a later time point on the overall response of initial response plus  
642 sustained cure. This result could result in specific superiority labeling for the test therapy.  
643

## 644 **5.2.3 Comments on Key Study Enrollment Criteria**

645 As discussed in Section 3.1.1 of this document, the Project Team recommends the following  
646 with regard to enrollment criteria:

- 647 1. *Lesion size*. The initial lesion size should be  $\geq 75$  cm<sup>2</sup> in adults. The Project Team agreed that  
648 further study is needed of smaller lesions in regions limited in size by anatomy or  
649 populations; e.g., pediatric patients.

- 650 2. *Lesion measurement.* Analyses by area and length, width, and length/width presented for  
651 linezolid studies indicate area could be used a primary assessment.
- 652 3. *Other local and systemic criteria.* The Project Team agreed that a minimum proportion of  
653 subjects with SIRS criteria is not necessary. Sponsors are encouraged to capture data on heart  
654 rate, blood pressure, respiratory rate, and WBC count and local pain, warmth, erythema, and  
655 drainage to ensure that studies address concerns about severity of illness and requirements  
656 for different registration authorities.
- 657 4. *Body temperature.* The presence of elevated body temperature is not required at enrollment  
658 or as an outcome measure (see discussion under Section 3.1.1).

#### 659 **5.2.4 Comments on Key Analysis Issues**

- 660 1. **Endpoint models.** The Project Team did not develop an endpoint model as defined in the  
661 draft FDA Guidance on Qualification Process for Drug Development Tools (FDA 2010,  
662 October). While the Project Team has focused on the endpoint of early response as measured  
663 by control of lesion spread, the team is vitally interested in defining other concepts that  
664 should be included in the endpoint model for ABSSSI. This will be evaluated as a component  
665 of future research.
- 666 2. **Outcome measure.** The suggested outcome measure is a comparison of differences in  
667 proportions of the numbers of subjects in each study group designated as “responders” based  
668 on the definition of control of lesion spread at 48 hours post first dose of study drug as  
669 defined above.
- 670 3. **Response assessment time point.** To avoid the bias that may be produced by following the  
671 rule of last observation carried forward (Fleming 2011), response in all study arms should be  
672 assessed at fixed time points following initiation of study therapy. This is especially  
673 important if study drugs are administered for different lengths of time.
- 674 4. **Inclusion of PK/PD analysis.** Collection of sufficient PK data to estimate individual subject  
675 drug exposure allows for more complete exposure-response analyses at both early and late  
676 endpoints and is strongly encouraged.
- 677 5. **Missing data.** Missing data can increase bias and decrease validity of clinical trials, so  
678 sponsors should attempt to minimize missing data as much as possible. Outcome measures  
679 that are meaningful and practical to the given clinical setting may help minimize missing  
680 data, such as not requiring multiple body temperature measurements within the 48- to 72-  
681 hour visit window in outpatients.
- 682 6. **ITT and per-protocol analyses.** The ITT analysis should be primary (hence, missing data are  
683 of critical importance). Per-protocol analyses should be assessed as supportive.
- 684 7. **Proposed non-inferiority margin.** The group did not discuss this in detail. Recent trials have  
685 most often employed a margin of 10%.
- 686 8. **Sample size considerations.** This was not discussed by the group and would depend on the  
687 hypothesis being tested, the specific population under study, the desired study power, and the  
688 proposed non-inferiority margin.
- 689 9. **Opportunities for global harmonization.** It was recognized by the Project Team that the  
690 alternative approach to endpoints under development might not be equally acceptable to all  
691 regulatory agencies. In minutes from an EMA workshop held on 7-8 Feb 2011, there was  
692 suggestion of submitting a separate SAP for ABSSSI trials, in which the primary endpoint of  
693 interest is late. These minutes point out that such an approach could satisfy multiple



694 regulatory agencies. The main issue is that sponsors should capture the data for both early  
695 and later assessments. See recent EMA workshop summary  
696 at [www.ema.europa.eu/docs/en\\_GB/document.../04/WC500105473.pdf](http://www.ema.europa.eu/docs/en_GB/document.../04/WC500105473.pdf) (pg 8-9). Guidance  
697 pending. Performing both early and later assessments, as outlined above, will provide a  
698 means of developing separate analyses for U.S. and other regulatory agencies. This could  
699 allow the same studies to meet different standards and thus become harmonized globally.

### 700 **5.2.5 Alternative Viewpoints**

701 There are alternative viewpoints within the Project Team regarding the conclusion that the  
702 primary measure should be based on a measure of reduction in the size of the associated  
703 erythema taken at 48h after initiation of therapy. Although there was agreement among team  
704 members that the early measurement provided important information, some concerns were raised  
705 and should be addressed in future research.

- 707 1. ***There is no evidence that use of test-of-cure (TOC) endpoints has led to approval of***  
708 ***inactive therapies for life-threatening infections such as ABSSSI (Spellberg 2011).***  
709 Although there are demonstrated instances of detection of differences in efficacy or safety  
710 among agents for life-threatening infections as well as instances of detection of ineffective  
711 agents that were not subsequently registered for the given indication (e.g., daptomycin for  
712 pneumonia), there are no data to support the contention that genuinely ineffective agents  
713 have been approved using traditional TOC endpoints. Older agents may well have been  
714 superseded by newer agents for reasons of safety, convenience, or development of resistance,  
715 but there are no data to suggest that the older agents were ineffective at the time of approval  
716 for their given indication. As discussed below, this is presumably because early endpoints  
717 have always been a part of traditional TOC endpoints, albeit not necessarily in a formal  
718 manner.
  - 719 a. Other members of the group pointed out that failure to show differences between drugs  
720 does not mean that differences do not exist in the setting of non-inferiority trials that may  
721 lack assay sensitivity.
- 723 2. ***Recent pharmacometric analyses show a correlation between drug exposure and TOC***  
724 ***endpoints.*** A recently presented observation (European Medicines Agency 2011) is that  
725 pharmacometric exposure-response analyses demonstrate a correlation of drug exposure with  
726 traditional clinical and microbiological endpoints.
  - 727 a. Arguments in favor of the plausibility of these correlations include:
    - 728 i. The demonstrated relationships indicate that contemporary clinical endpoints (e.g.,  
729 success or failure at the TOC) capture a measure of drug effect.
    - 730 ii. These analyses produce estimates of treatment effect relative to placebo, which are  
731 similar to estimates derived from other sources but that are derived using current data  
732 from modern studies and thereby could negate concerns of meeting the constancy  
733 assumption.
    - 734 iii. The consistency of these observations (similar results can be shown across both  
735 multiple indications [HAP, VAP, CAP, ABSSSI, and ABECB] and multiple  
736 antibiotic classes), the biological plausibility of the observations (drug effect should  
737 decline as exposure declines); the retention of the correlations when the analysis is

738 controlled for age, severity of illness, or co-morbid disease; and the lack of an  
739 hypothesis regarding a host immune factor that would correspondingly alter drug  
740 exposure lend support to the need to consider carefully this approach.

741 iv. In particular, this approach offers the possibility of validating non-inferiority margins  
742 using modern trial designs and modern endpoints. Moreover, pharmacometric  
743 exposure-response analyses offer the possibility of linking early and contemporary  
744 late clinical endpoints.

745 b. This approach, however, can also be critiqued:

746 i. Although these analyses are useful for identifying prognostic factors and generating  
747 hypotheses regarding plausible doses and schedules to be studied in properly  
748 conducted randomized trials, attempts at causal inferences from such analyses are  
749 biased due to confounding between treatment effects and prognostic patient  
750 characteristics.

751 ii. Specifically, it is not sufficient that exposure or organisms may be randomly assigned  
752 since host factors are not randomly assigned and these latter factors cannot be  
753 adequately accounted for by matching. People with differing concentrations or  
754 minimum inhibitory concentrations can differ on other factors that affect outcome,  
755 like age, severity of illness, co-morbid disease, or many other covariates, and most of  
756 these are unidentified or unrecorded. Inherent differences in such patient  
757 characteristics are sufficiently influential to lead to substantial differences in  
758 concentrations; therefore, it is likely that these inherent differences are also  
759 meaningfully predictive of the outcome measures.

760 iii. The consistency of results across settings may thus be explained by consistency of  
761 this same bias across those settings.

762

763 3. ***Cessation of spread alone is an insufficient measure.*** Cessation of spread of the  
764 erythematous lesions supports a non-inferiority margin to compare treatment effect between  
765 two drugs. However, it alone is not necessarily sufficient to indicate clinical response and  
766 serve as primary efficacy endpoint. As noted above, erythema is a biomarker for clinical  
767 response, albeit a biomarker with a high degree of biological plausibility and the appearance  
768 of a good linkage to the course of this disease (or, at least, to the course of the related  
769 inflammatory process). As noted by the Project Team during the discussion of the Cerexa  
770 (ceftaroline) dataset (see Appendix for further details), “We should be mindful about  
771 equating the Day 3 reduction in lesion size to how a patient functions or feels. It is tempting  
772 to think that a reduction in lesion size might make a difference to a patient; however, there is  
773 no definitive evidence thereof. Thus, one cannot conclude that it has any meaning to the  
774 patient, such as earlier discharge, reduced purulent complications, shorter treatment time,  
775 etc.” The Project Team agreed that defining the components of the endpoint model is a  
776 critical part of future research.

777

778 4. ***Lesion size requirements may exclude key groups.*** A requirement for  $\geq 75\text{cm}^2$   
779 erythema/redness edema and swelling was noted to exclude some patient groups of interest  
780 (e.g., adults with infections of hands, face, and genital organs, and children); however, no  
781 data were presented on operational characteristics of measurements at these anatomic sites or  
782 populations.

783

- 784 5. **Early time points are already part of the TOC outcome.** An early measure of response is  
785 included in all clinical trials, but the timing and formality of this evaluation may differ from  
786 trial to trial, and there is not a systematic requirement for investigators to make a final  
787 assessment at this time point. If improvement is not apparent at Day 3 or 4, the patient is  
788 generally withdrawn from study medication and the response defined as a failure for  
789 effectiveness analyses. These outcomes are carried forward for purposes of analyses at later  
790 time points. In some trials, this early assessment has been entirely informal and is captured  
791 only by noting whether the physician and patient continued the randomized therapy. In other  
792 trials, a formal recording of a decision to continue has been taken. A systematic analysis of  
793 early time points with clear definitions of outcomes would help clarify the analysis of trial  
794 results. A great strength of the work presented here is that it provides a basis for documenting  
795 the reasoning that goes into the decision to continue or discontinue therapy at an early time  
796 point. Early and later time point assessments are not mutually exclusive and can both be  
797 measured in the setting of clinical trials.  
798
- 799 6. **Later endpoints provide a key overall perspective.**
- 800 a. Overall clinical cure at a late time point following EOT is important to evaluate sustained  
801 response and should be noted in the product labeling. Given that this measure thus takes  
802 on the role of being the principal measure that is relevant to the use of a drug, it could be  
803 argued that this measure best meets the ICH E9 (Section 2.2.2) test: “The primary  
804 variable (‘target’ variable, primary endpoint) should be the variable capable of providing  
805 the most clinically relevant and convincing evidence directly related to the primary  
806 objective of the trial.”
- 807 b. Use of the early endpoint as the primary study endpoint has not, to date, been specifically  
808 endorsed by other regulatory agencies. The full implications of the use of dual SAPs have  
809 yet to be understood by the community.  
810
- 811 7. **Time to response may provide useful insights.** Some in the group posed that response rates  
812 that are equivalent with a substantial reduction in lesion size at EOT and TOC are what  
813 matters most to clinicians and patients; however, there are no systematic studies evaluating  
814 this question by surveying patients or clinicians. Since clinicians often choose to change  
815 therapy in the absence of response within 2 or 3 days, the early time point must have some  
816 value in addition to later time points evaluating sustained response or other variables such as  
817 adverse events. Time to response may also be an important measure but not one for which  
818 there are data to pose a hypothesis for a non-inferiority trial.

## 819 **5.2.6 Additional Information Needed To Advance to Final Recommendations**

820 (See Section 4 for more detailed discussion)

821  
822 It is clear from an analysis of current data that the evidence base for determining outcomes in  
823 ABSSSI is still incomplete. In some situations such as pediatrics, the Project Team was not able  
824 to analyze any data. It is crucial that future studies address the research gaps in terms of what  
825 outcomes are most important to patients and how to reliably and reproducibly assess outcomes in  
826 ABSSSI across various disease states (cellulitis, abscess, etc.), in populations (pediatrics, adults),  
827 and various anatomic sites.

- 828 • Qualitative research phase of project and assessment of various measurement instruments as  
829 described above and development of an endpoint model for ABSSSI;
- 830 • Analysis of baseline measures and outcomes by anatomic site;
- 831 • Analysis of baseline measures and outcomes in pediatric populations;
- 832 • Analysis of comparison of area or length by width measurements in two of the datasets;
- 833 • A better understanding of the relationship between erythema and how patients feel and  
834 function; and
- 835 • The use of pharmacometric-based analysis methods should be explored as a possible  
836 complementary tool to further validate both early and late endpoints. Methods that evaluate  
837 randomized groups would help control for bias in these analyses.

## 838 **6 Conclusions**

839 In the process outlined, above various stakeholders including members of academia, industry,  
840 and Government agencies proposed interim bridging outcome measures for currently planned  
841 trials in the ABSSSI indication.

842  
843 These interim outcome measures are based on an evidence-based analysis of the historical  
844 literature that showed evidence for a treatment effect of antimicrobials in ABSSSI based on the  
845 control of lesion spread at 48-72 hours after the first dose of study drug and recently performed  
846 clinical trials. Although the proposed outcome measure is a biomarker, its use in this setting is  
847 based on the non-quantified observed relationship between erythema and how patients feel and  
848 function. The 48-72-hour time point shows a substantial treatment effect for antimicrobials,  
849 allowing assessment of non-inferiority of active agents at this time point. This large treatment  
850 effect (M1) provides a justification for selection of an M2 on the basis of clinical reasoning.

851  
852 The Project Team agreed that the analyses evaluated by the group were relevant to the context of  
853 use in the studies evaluated. Sponsors may propose other outcome measures and timing of those  
854 measures in disease settings that differ substantially from the studies evaluated by the Project  
855 Team.

856  
857 The Project Team agreed that later assessments are important to provide an evaluation of  
858 sustainability of initial response, as well as to provide other measures of how patients feel and  
859 function over a longer time period as well as to support proposed duration of dosing in the USPI.  
860 The Project Team agreed that these assessments should be included in studies of ABSSSI as in  
861 the recent ceftaroline FDA approval.

862  
863 These interim outcome measures would allow studies to proceed while the Project Team plans  
864 future qualitative and quantitative research studies to evaluate the relationship between outcome  
865 measures in ABSSSI and the operational characteristics of various measurement methods in  
866 assessing outcomes in ABSSSI. These future studies are critical in addressing knowledge gaps  
867 that would aid in addressing unanswered questions related to designing trials in ABSSSI.

868

## 868 7 Appendix—Clinical Trial Data

### 869 7.1 *Cerexa, Inc., Data*

- 870 1. A brief overview of clinical trial data as analyzed by FDA was given. The analysis includes  
871 data from two identical, multinational, randomized, double-blinded non-inferiority Phase 3  
872 studies of ceftaroline versus vancomycin plus aztreonam, using a non-inferiority margin of  
873 10%, based on a pre-specified clinical response at TOC. Briefly, drug treatment was  
874 administered intravenously for 5–14 days with no oral step-down therapy. Daily “separate”  
875 lesion length times width and temperature measurements were recorded for the first 5 days of  
876 treatment.
- 877 2. Of the 1,396 subjects enrolled, approximately 57% were in the FDA-defined Modified Intent  
878 To Treat (MITT) population, with a lesion size at baseline  $\geq 75$  cm<sup>2</sup> originating from an  
879 infected wound, abscess (with > 5 cm surrounding cellulitis), or deep/extensive cellulitis or  
880 an ABSSSI in patients with diabetes mellitus or peripheral vascular disease. For the subgroup  
881 of patients with a lesion size greater than or equal to 75 cm<sup>2</sup>, demographic data were  
882 presented on the percentage of patients with fever (41–47%) and increased WBC count (42–  
883 50%). The range of lesion size was 75–5,000 cm<sup>2</sup>, with cellulitis as the major infection type.  
884 Clinical response for the exploratory analysis was defined as both “cessation of lesion  
885 spread” at Day 3 (comparing length times width measurements from baseline) and a  
886 temperature  $\leq 37.6$  °C.
- 887 3. Based on the primary Day 3 endpoint (cessation of spread and afebrile), the responder rates  
888 were in the upper 60% range for the vancomycin group and 74% for the ceftaroline group,  
889 with a treatment difference of approximately 6–9 percentage points in favor of ceftaroline.  
890 Evaluating percent reduction, patients considered a responder exhibited a 10–20% reduction  
891 in lesion size regardless of the treatment given, with a fairly constant treatment difference  
892 remaining throughout the percent reduction range.
- 893 4. In comparing patient populations with and without fever at baseline, “cessation of spread”  
894 occurred in 83–93%, regardless of baseline fever. The presence of fever at Day 3 did not  
895 affect the achievement of “cessation of spread.” Also, it should be noted that about 5–10% of  
896 patients developed fever (or perhaps had documentation of pre-existing fever) after study  
897 enrollment.
- 898 5. Responder rates are in the 50–60% range with fever as a requirement at baseline, whereas  
899 without fever, the rate is in the 70% to upper 80% range.
- 900 6. In conclusion, for cessation of lesion spread (from 0% up to a 20% reduction), the absolute  
901 treatment difference remains relatively similar between groups; however, the responder rate  
902 decreases substantially; i.e., the power decreases by requiring increased percent reduction of  
903 lesion spread. From the FDA’s perspective, it is most practical to use an absolute reduction  
904 compared to the baseline measure in lesion size as an endpoint as opposed to cessation of  
905 lesion spread compared to a post-randomization measurement obtained on the previous day.  
906 Cessation of lesion spread is unrelated to the presence of baseline fever; responder rate is  
907 influenced more by defervescence.  
908

909 Clarification questions and responses:

- 910 1. Vancomycin fever, known to occur in approximately 5% of patients, might have confounded  
911 the data. Specifics about the frequency of this event are not readily available. Skin reactions  
912 (rash) to vancomycin generally appear on treatment Day 1, requiring treatment termination.
- 913 2. The circumstances surrounding patient study enrollment (e.g., hospital or emergency room  
914 [ER]) can greatly impact whether fever is documented. For example, in a hospital setting, the  
915 daily highest temperature is recorded, whereas in the ER, the temperature measurement is  
916 often a one-time event. The uncontrolled use of self-administered antipyretics is another  
917 problem that could influence temperature in the ER setting and was not controlled in these  
918 studies.
- 919 3. There were no differences between groups with respect to the length of therapy, which was  
920 8.5 days throughout.
- 921 4. In analyzing the data, there is more signal when one looks at increasing the fraction of  
922 patients that have a substantial reduction of >50 or 75%. Also, when the measurement is  
923 performed later in the course of therapy, sensitivity is lost; if there is a treatment effect, there  
924 is greater sensitivity at Day 3. If there is a direct relationship between lesion size and pain,  
925 this is one example of capturing something of significance to patients.
- 926 5. We should be mindful about equating the Day 3 reduction in lesion size to how a patient  
927 functions or feels. It is tempting to think that a reduction in lesion size might make a  
928 difference to a patient; however, there is no definitive evidence thereof. Thus, one cannot  
929 conclude that it has any meaning to the patient, such as earlier discharge, reduced purulent  
930 complications, shorter treatment time, etc.
- 931 6. The fact that the response rates are equivalent with a substantial reduction in lesion size at  
932 EOT is what matters most to clinicians and patients.
- 933 7. Of note, an early measure of response is included in every clinical trial today; if improvement  
934 is not apparent at Day 3 or 4, the patient is withdrawn from the trial due to failure. One  
935 should be careful about saying the late TOC measure is flawed; rather, one should consider  
936 the total treatment course, incorporate early failure, and carry it forward. From the Snodgrass  
937 data and in CABP, there is a greater sense to look uniformly over time rather than an earlier  
938 time point.
- 939 8. There are two issues regarding clinical relevance. From the Snodgrass data, there is a concern  
940 (but not proof) that if one evaluates response later in treatment, success can be observed with  
941 an ineffective treatment. Thus, success rates that are similar “early” may reflect treatment  
942 effects, whereas success rates that are similar “late” may be consistent with a placebo effect.
- 943 9. The relationship of how patients feel, function, or survive to a reduction in lesion size from  
944 baseline of 30% or 50% is unknown, although clinicians believe patients have improved if  
945 the lesion has stopped spreading early in treatment. Snodgrass realized this by just looking at  
946 lesion spread. Stability versus baseline AND improvement versus baseline are being  
947 considered as the Day 3 endpoint because of the statistical concern regarding use of a post-  
948 baseline as baseline. Perhaps PRO data can provide more direct insight and guidance on how  
949 to define “x” in terms of clinical relevance. Also, how patients’ signs relate to symptoms is a  
950 good example of what should be evaluated in the next phase of this project.
- 951 10. Clinical stability is an operational indicator used to make decisions about whether or not to  
952 escalate treatment or change to oral therapy. However, there are instances where different  
953 lesions, depending on anatomical sites, decrease in size more quickly than others. This  
954 complexity requires further investigation. Moreover, these observations only reflect what is

- 955 viewed on the surface and not the depth of the lesion that is present. We know from treating  
956 patients that there is a point where the lesion has stopped spreading, which is when the  
957 patient feels better.
- 958 11. Responder rates should only be high—roughly 90% for a drug like vancomycin—at an EOT  
959 or TOC that matters most to the patient. For a new drug, it is difficult to show superiority in a  
960 primary analysis; in a secondary analysis, it is very useful to support the non-inferiority  
961 finding.
  - 962 12. Regarding erythema, the variations in measurement methods for assessments of lesion sizes  
963 have not been characterized.
  - 964 13. With respect to EOT, if a patient fails on Day 3, then that is considered the EOT. Therefore,  
965 EOT is not a fixed point in time.

## 966 **7.2 Durata Therapeutics Data**

- 967 1. A reanalysis of the VER001-09 study in ABSSSI was performed with the goal of identifying  
968 novel endpoints to move the program forward. The data are from a randomized, double-  
969 blind, multicenter Phase 3 trial comparing intravenous linezolid with dalbavancin for  
970 treatment of complicated skin infections (one-third had cellulitis, one-third had abscess, and  
971 one-third had wound infection or “other” soft tissue infections, but many with “other” were  
972 reclassified as having cellulitis).
  - 973 2. The purpose of the reanalysis was to examine changes in lesion size after the initiation of  
974 antimicrobial therapy and to better understand the performance of cessation of spread at Days  
975 3 and 4. Thus, lesion size was measured at Days 3, 4, 8, and later. Patients received either  
976 dalbavancin on Day 1 and Day 8, or linezolid every 12 hours, but could switch to oral forms  
977 of the drug after Day 1 (most switched at about day 4).
  - 978 3. This analysis was designed to assess response in the subgroup of patients with  $\geq 75$  cm<sup>2</sup>  
979 cellulitis.
  - 980 4. The primary endpoint was clinical success in the dalbavancin group at Day 28.  
981 Inclusion/exclusion criteria were similar to the trials described previously, although MRSA  
982 patients were included in this study to better understand its effect on the drug. The median  
983 lesion size of these patients was 260 cm<sup>2</sup>.
  - 984 5. The response rates for dalbavancin and linezolid are significantly lower (69–78%) if patients  
985 with missing data are included as a failure. However, when the missing data are excluded, the  
986 cessation of spread success rate is greater for both groups (88–89%).
  - 987 6. With a mean baseline lesion size of 260 cm<sup>2</sup> at Day 3, there was a 40% reduction (105 cm<sup>2</sup>)  
988 at Day 4, and a further reduction in lesion size to 229 cm<sup>2</sup> by Day 8, indicating that about  
989 50% of the lesion size diminution occurs at study Day 3 or 4. Patients considered a clinical  
990 failure experienced a 20% increase in lesion size above baseline.
  - 991 7. Inclusion of fever resolution, cessation of spread, and missing data (regarded as failures) in  
992 the analysis produces a success rate of 78%, whereas exclusion of fever and missing data  
993 produces a response rate of 88–89%. Regardless, there were no treatment differences  
994 between the two drugs tested.
  - 995 8. In summary, missing data complicates interpretation; better data are needed to correlate early  
996 responders to clinical outcome as defined at EOT. Inclusion of fever as a clinical marker is  
997 debatable.
- 998

999

1000 Clarification questions and responses:

- 1001 1. In assessing clinical failures, lesion size obtained early in the study should be correlated with  
1002 lesion size at EOT or TOC.
- 1003 2. Temperature does not appear to be an effect modifier and does not change the difference  
1004 between these two drugs; therefore, inclusion of fever does not add value to the overall study  
1005 conclusions.

1006 **7.3 Pfizer Data**

- 1007 1. The following analyses are from the Pfizer study “Linezolid versus Vancomycin in  
1008 Treatment of Complicated Skin and Soft Tissue Infections” (Weigelt et al. 2005).
- 1009 2. The study was a Phase 4, open-label, randomized non-inferiority trial including 1,200  
1010 patients enrolled throughout 16 countries. Hospitalized patients ( $n = 1,180$ ) with a wound  
1011 infection, cellulitis, abscess, infected ulcer, burn, or other soft tissue infection were  
1012 randomized to receive linezolid via intravenous followed by change to oral administration  
1013 (600 mg, q12h;  $n = 592$ ) or vancomycin (1 g, q12h;  $n = 588$ ) via intravenous administration  
1014 followed by change to appropriate orally administered antibacterial drug for a total of 7–14  
1015 days of therapy. Other enrollment criteria included erythema  $\pm$  induration (no size  
1016 requirement), heat/localized warmth, and pain/tenderness or drainage/discharge plus  
1017 evidence of one of the following systemic signs: fever, hypothermia, hypotension, and WBC  
1018 count  $>10,000 \text{ mm}^3$  or  $> 15\%$  immature neutrophils.
- 1019 3. Scheduled patient visits were conducted at baseline, daily during the first 4 days of therapy,  
1020 and at study Day 7. Patients who switched from intravenous to oral therapy received an  
1021 additional visit at that time, plus visits at EOT and TOC (7 days after EOT).
- 1022 4. Erythema was measured by both length and width; if applicable, induration length and width  
1023 were also recorded on study visit case report forms. No information is available regarding  
1024 measurement methodology. Separate length times width lesion measurements were analyzed  
1025 as well as a “length and width” analyses of the ceftaroline data only; however, these data are  
1026 unavailable until QC is performed.
- 1027 5. The primary objectives of the analyses were (1) to define the time course for lesion  
1028 measurements and (2) to fully characterize what constitutes a responder (success). Success is  
1029 defined as a change from baseline of lesion size  $< x\%$  at the 48- and 72-hour assessments  
1030 compared to the previous lesion size measurement and no increase in lesion size at the 48- or  
1031 72-hour assessment. Accordingly, if  $x = 0\%$ , the lesion size cannot have increased compared  
1032 to baseline; if  $x =$  a negative percent ( $x < 0\%$ ), the lesion must have decreased compared to  
1033 baseline; if  $x =$  a positive percent, the lesion size can be larger than baseline.

1034

1035 Results:

- 1036 1. Demographics: Most patients were middle-aged men with cellulitis (5%) or major abscess  
1037 (28%). Elevated WBC count (66%) was the most prevalent systemic sign in the study  
1038 population, followed by fever (41%). The predominant local signs and symptoms were  
1039 heat/localized warmth (93.4%) and pain/tenderness (92.2%). Fifty-five percent (55%)  
1040 received antibiotics for the entire 14-day study course. Concomitant antibiotic use was  
1041 allowed for treatment of gram-negative bacteria. In cases of methicillin-susceptible *S. aureus*  
1042 (MSSA; 21.3%), vancomycin could be switched to oxacillin, nafcillin, flucloxacillin or



- 1043 dicloxacillin. Other identifiable pathogens in patients included MRSA (29.6%) and  
1044 *Streptococcus pyogenes* (4.2%).
- 1045 2. The incidence of MRSA (29.65%) should not be interpreted as a less severe group of  
1046 infections. It is a very aggressive pathogen, and patients can become very ill, even with small  
1047 lesions. Also, there are distinctions between MRSA-induced abscesses and streptococcal  
1048 cellulitis—lesions of cellulitis have larger surface areas. However, cellulitis is also  
1049 commonly associated with abscess.
  - 1050 3. Regarding lesion size data, the mean erythematous area for all patients in the trial regardless  
1051 of infection type was 400 cm<sup>2</sup>, with a median area of 138 cm<sup>2</sup>. Patients with cellulitis had the  
1052 largest lesion area (592 cm<sup>2</sup>), whereas abscesses were the smallest (184 cm<sup>2</sup>). The lack of  
1053 enrollment limitations with respect to lesion size contributed to large standard deviations.  
1054 Induration measurements followed a similar pattern, with a mean area of 206.76 cm<sup>2</sup> among  
1055 all patients, with the largest mean area in cellulitis (340.80 cm<sup>2</sup>). In considering pathogen  
1056 type, the highest mean area is found in *S. pyogenes* patients, followed by those infected with  
1057 MSSA or MRSA.
  - 1058 4. In the box plot analyses, a definite downward trend in erythema area and induration over  
1059 time is apparent, though not pronounced. In lesions < 75 cm<sup>2</sup> assessed by study day, the  
1060 median erythema area progressively decreased, with outliers clustered in the 75% range.  
1061 Induration lesion size > 75 cm<sup>2</sup> displays a similar downward trending pattern.
  - 1062 5. The evaluation of erythema area by study day also shows a downward trend for clinical  
1063 successes. However, this trend is not apparent in the erythema area EOT analysis of clinical  
1064 failures or indeterminate outcomes. Overall, the mean and median erythema and induration  
1065 lesion size, as measured by area, length, or width decreases over the study periods examined.  
1066 These result are consistent for lesion sizes greater or less than 75 cm<sup>2</sup>; lesion size increased in  
1067 a small patient subgroup (< 10%).  
1068

1069 Clarification questions and responses:

- 1070 1. EOT ranges from 7 to 14 days, but in patients considered a failure/indeterminate, the EOT is  
1071 earlier. Lesion measurements from study Day 7 are not available.
- 1072 2. Of concern, there are a large number of patients missing in the analysis of  
1073 erythema/induration lesion measurements at later study days: the number changes  
1074 substantially from baseline; e.g., 962 patients at Day 1 versus only 618 patients at Day 4. The  
1075 loss of so many patients from analysis is an important consideration in designing future  
1076 clinical trials. Some patients with missing data could be a failure, in which case the lesion  
1077 size would have been larger. Failures that occurred on Day 3 or Day 4 were included in the  
1078 analysis. However, if patients failed on Day 2, the lesion size measurement was removed  
1079 from the analysis and not carried over to Day 3, subsequently lowering the overall numbers  
1080 for Day 3 and Day 4. Other possible explanations include patients being switched to oral  
1081 equivalents on an outpatient basis (hence not returning for subsequent study visits) or  
1082 patients experiencing a successful outcome at Day 3.
- 1083 3. The definition of clinical failure was not described in the presentation. (From the Weigelt  
1084 paper, patients were “considered failed if they exhibited persistence or progression of the  
1085 baseline clinical signs and symptoms of infection, development of new clinical findings  
1086 consistent with active infection, or an inability to complete the study because of adverse  
1087 events.”) Also, it is not clear what proportion of patients had lesions that increased from Day  
1088 1 and decreased at Day 2. In general, the study was not designed specifically to examine

- 1089 erythema measurements alone, although it is part of the study protocol. Clinical assessment  
1090 at TOC is the primary objective for which measurements are available.
- 1091 4. To better define what constitutes success for “control of lesion spread”, the percent decrease  
1092 in lesion spread “between” and “within” time points was examined. According to criteria  
1093 established by the Project Team at the June 2, 2010 meeting, “success of control of lesion  
1094 spread” includes: (1) change from baseline in lesion size of < x% at the 48- to 72-hour  
1095 assessment and (2) compared to the previous lesion size measurement, no increase in lesion  
1096 size at the 48- to 72-hour assessment. Increases in lesion size were easily identified using  
1097 relative percent change in lesion size from study Day 3 versus Day 2, or study Day 4 versus  
1098 Day 3. Assessments of decrease in lesion size were more problematic as evidenced by  
1099 oscillating incremental changes. However, there were no increases in lesion size in patients  
1100 responsive at EOT, though the analysis does not include missing data, which could confound  
1101 interpretation of the data.
  - 1102 5. Sensitivity and specificity were examined by comparing no increase from baseline (as agreed  
1103 to previously) as opposed to a baseline decrease where  $x = -5\%$ . When the criterion is no  
1104 increase in lesion size from baseline, the clinical response rate is 91.5%, whereas reducing  
1105 the required change to -5% lowers the clinical success rate to 86.1%. Thus, increasing  
1106 specificity modestly reduces the clinical response rate.
  - 1107 6. Regarding antibiotic use, patients without prior antibiotic exposure had a slightly better  
1108 outcome (93%) with respect to achieving cessation of lesion spread than did those with  
1109 previous antibiotic treatment (90%). Better outcomes were also observed in patients who had  
1110 undergone incision and drainage than those who did not.
  - 1111 7. Based on erythema measurements, patient outcomes with regard to control of lesion spread  
1112 were higher at study Day 4 than at study Day 3. Control of lesion spread, as determined by  
1113 measuring the change in erythema from baseline to Day 3, produced higher outcomes than if  
1114 one used measurement definitions established by the Project Team on June 2, 2010.
  - 1115 8. In maximizing sensitivity and specificity, one needs confidence in the endpoint of the clinical  
1116 investigator’s assessment, which is not clearly a gold standard, particularly since intra-  
1117 operator reproducibility is unknown.
  - 1118 9. Whether measurement of induration is an accurate measurement of erythema is unclear, but  
1119 induration does occur subsequent to erythema.
  - 1120 10. As summarized, success for control of erythema lesion spread is high (89%– 90%); however,  
1121 there are drawbacks. The definition does not include missing patient data and does not  
1122 consider patients with a prior history of antibiotic use as a treatment failure. Control of lesion  
1123 spread (erythema) differs only slightly based on antibiotic use within the prior 14 days, and a  
1124 greater proportion of patients who had undergone incision and drainage of cutaneous  
1125 abscesses had control of lesion spread. When comparing day 3 assessments between patients  
1126 who were considered failures versus successes at EOT, there was not a trend in differences  
1127 between lesion size assessments at day 3.
- 1128  
1129

## 1129 **8 Project Team Members**

1130 The conclusions described within this document represent the work of the FNIH Biomarkers  
1131 Consortium Project “Developing Endpoints for Clinical Trials of Drugs for Treatment of Acute  
1132 Bacterial Skin and Skin Structure Infections and Community-Acquired Bacterial Pneumonia  
1133 (Phases 1 and 2).”

- 1134 • Joseph Toerner, M.D., M.P.H. (Co-chair; FDA, non-voting)
- 1135 • George H. Talbot, M.D. (Co-chair; IDSA)
- 1136 • Jeff Alder, Ph.D. (Bayer)
- 1137 • Paul G. Ambrose, Pharm.D. (Inst. for Clinical Pharmacodynamics; University of Oxford)
- 1138 • Helen Boucher, M.D. (Tufts University)
- 1139 • John Bradley, M.D. (University of California, San Diego)
- 1140 • Laurie Burke, R.Ph., M.P.H. (FDA, non-voting)
- 1141 • Aaron Dane, Ph.D. (AstraZeneca);
- 1142 • Anita Das, Ph.D. (AxiStat)
- 1143 • Dennis Dixon, Ph.D. (NIH/NIAID)
- 1144 • Mike Dunne, M.D. (Durata Therapeutics)
- 1145 • Barry Eisenstein, M.D. (Cubist)
- 1146 • Thomas Fleming, Ph.D. (University of Washington)
- 1147 • Dean Follmann, Ph.D. (NIH/NIAID)
- 1148 • David Friedland, M.D. (Cerexa)
- 1149 • Ian Friedland, M.D. (Cubist)
- 1150 • Nickolas Kartsonis, M.D. (Merck)
- 1151 • Achim Kaufhold, M.D., Ph.D. (Basilea)
- 1152 • Scott Komo, Dr.P.H. (FDA; observer, non-voting)
- 1153 • Mike Kurilla, M.D., Ph.D. (NIH/NIAID)
- 1154 • Kim Lindfield, Ph.D. (Cubist)
- 1155 • Lily Llorens, Ph.D. (Cerexa)
- 1156 • Shawnmarie Mayrand-Chung, J.D., Ph.D. (FDA, non-voting)
- 1157 • Susan Moriarty, M.D. (Cempra)
- 1158 • Sumati Nambiar, M.D. (FDA; observer, non-voting)
- 1159 • Gary Noel, M.D. (Paratek Pharmaceuticals)
- 1160 • David Oldach, M.D. (Cempra)
- 1161 • Elektra Papadopoulos, M.D. (FDA, non-voting)
- 1162 • Roger Pomerantz, M.D. (Merck)
- 1163 • John Powers, M.D. (SAIC in support of NIH/NIAID)
- 1164 • Philippe Prokocimer, M.D. (Trius)
- 1165 • John Quinn, M.D. (Pfizer)
- 1166 • John Rex, M.D. (AstraZeneca)
- 1167 • Jennifer Schranz, M.D. (Cempra)
- 1168 • Judith A. Siuciak, Ph.D. (FNIH, non-voting)
- 1169 • William Stubbings, Ph.D. (Basilea)
- 1170 • David Wholley (FNIH, non-voting)

1171

## 1172 9 References

1173

1174 Boucher, H. W., G. H. Talbot, et al. (2009). "Bad Bugs, No Drugs: No ESKAPE! An Update  
1175 from the Infectious Diseases Society of America." *Clin Infect Dis* **48**(1): 1-12.

1176 Dieffenbach C.W., E.C. Tramont, S.F. Plaeger. (2010). Innate (General or Nonspecific) Host  
1177 Defense Mechanisms, Chapter 4 from Mandell, Douglas, and Bennett's Principles and  
1178 Practice of Infectious Diseases (7th Edition). Mandell G.L., J.E. Bennett, and R. Dolin,  
1179 Eds. Churchill, Livingstone, Elsevier (Philadelphia, PA).

1180 European Medicines Agency. (2011). Workshop on Antibacterials: Report of the Workshop. 17  
1181 March 2011. Retrieved from  
1182 [http://www.ema.europa.eu/docs/en\\_GB/document\\_library/Report/2011/04/WC50010547](http://www.ema.europa.eu/docs/en_GB/document_library/Report/2011/04/WC500105473.pdf)  
1183 [3.pdf](http://www.ema.europa.eu/docs/en_GB/document_library/Report/2011/04/WC500105473.pdf)

1184 Fleming, T.F. (2011). Addressing missing data in clinical trials. *Ann Intern Med* **154**: 113-117.

1185 Food and Drug Administration, Center for Drug Evaluation. (2010, August). "Guidance for  
1186 Industry: Acute Bacterial Skin and Skin Structure Infections: Developing Drugs for  
1187 Treatment." Retrieved from  
1188 [http://www.fda.gov/downloads/Drugs/GuidanceComplianceRegulatoryInformation/Guid](http://www.fda.gov/downloads/Drugs/GuidanceComplianceRegulatoryInformation/Guidances/ucm071185.pdf)  
1189 [ances/ucm071185.pdf](http://www.fda.gov/downloads/Drugs/GuidanceComplianceRegulatoryInformation/Guidances/ucm071185.pdf)

1190 Food and Drug Administration, Center for Drug Evaluation. (2010, October). "Guidance for  
1191 Industry: Qualification Process for Drug Development Tools." Retrieved from  
1192 [http://www.fda.gov/downloads/Drugs/GuidanceComplianceRegulatoryInformation/Guid](http://www.fda.gov/downloads/Drugs/GuidanceComplianceRegulatoryInformation/Guidances/UCM230597.pdf)  
1193 [ances/UCM230597.pdf](http://www.fda.gov/downloads/Drugs/GuidanceComplianceRegulatoryInformation/Guidances/UCM230597.pdf)

1194 Langemo, D.K., H. Melland, D. Hanson, B. Olson, S. Hunter, S.J. Henly. (1998). Two-  
1195 dimensional wound measurement: comparison of 4 techniques. *Adv Wound Care* **11**(7):  
1196 337-43.

1197 Micheel, C.M., & Ball J.R. (Eds.). (2010). Evaluation of Biomarkers and Surrogate Endpoints in  
1198 Chronic Disease. Institute of Medicine: Committee on Qualifications of Biomarkers and  
1199 Surrogate Endpoints in Chronic Disease. Available at  
1200 <http://www.nap.edu/catalog/12869.html>

1201 Moran, G.J., A. Krishnadasan, R.J. Gorwitz, et al. (2006). "Methicillin-resistant *S. aureus* among  
1202 patients in the emergency department." *N Engl J Med* **355**(7): 666-74.

1203 Nauseef W.M., R.A. Clark. (2010). Granulocytic phagocytes, Chapter 8 from Mandell, Douglas,  
1204 and Bennett's Principles and Practice of Infectious Diseases (7th Edition). Mandell G.L.,  
1205 J.E. Bennett, and R. Dolin, Eds. Churchill, Livingstone, Elsevier (Philadelphia, PA).

1206 Snodgrass, W.R., & T. Anderson. (1937). Prontosil in Erysipelas. *Br Med J* **2**(3993): 101-104.

1207 Snodgrass, W.R., & T. Anderson. (1937). Sulphanilamide in the Treatment of Erysipelas. *Br*  
1208 *Med J* **2**(4014): 1156-1159.

1209 Spellberg, B. (2011). The tribulations of trials for antibacterial drugs. *Clin Invest* (in press).

1210 Weigelt, J., K. Itani, D. Stevens, W. Lau, M. Dryden, C. Knirsch, the Linezolid CSSTI Study  
1211 Group. (2005). Linezolid versus Vancomycin in Treatment of Complicated Skin and Soft  
1212 Tissue Infections. *Antimicrob Agents Chemother* **49**(6); 2260-2266.
