# Supplementary material
Source: PubMed Central journal article supplement (PMC3529608)
Supplement: supp_cis566_cis566suppl2.pdf [file supp_cis566_cis566suppl2.pdf]

**Recommendations to FDA for Interim Endpoints for Clinical  
 Trials in Community-acquired Bacterial Pneumonia**  
**Foundation for the National Institutes of Health Biomarkers Consortium**  
**Project Team**  
**CABP Docket ID: FDA-2009-D-0136**

**Contents**

|       |                                                                                |    |
|-------|--------------------------------------------------------------------------------|----|
| 0     | Executive Summary .....                                                        | 2  |
| 1     | Introduction/ Background .....                                                 | 3  |
| 1.1   | Background .....                                                               | 3  |
| 1.2   | Approach Taken by the Project Team .....                                       | 6  |
| 2     | Summary of Project Team Process .....                                          | 7  |
| 2.1   | Phase 1: Retrospective Data Analyses .....                                     | 7  |
| 2.1.1 | Summary of Existing Datasets .....                                             | 7  |
| 2.1.2 | Review of Historical Data .....                                                | 8  |
| 2.1.3 | Tigecycline vs. Levofloxacin - Hypothesis Generation .....                     | 10 |
| 2.1.4 | Analysis of Ceftriaxone Treatment Data - Limited Hypothesis Testing .....      | 15 |
| 2.1.5 | Analyses Undertaken During Review of the Ceftaroline Phase 3 CABP Studies .... | 17 |
| 2.1.6 | Data Not Yet Available and Needed for Project Team’s Final Recommendations..   | 19 |
| 2.1.7 | Conclusions .....                                                              | 20 |
| 2.2   | Phase 2: Qualitative Research Phase .....                                      | 21 |
| 3     | Interim Recommendations .....                                                  | 21 |
| 3.1   | Description of an Early Endpoint .....                                         | 21 |
| 3.2   | Alternative Viewpoints, Issues, Limitations, and Areas for Future Work .....   | 24 |
| 4     | Conclusions .....                                                              | 28 |
| 5     | Supplemental Data .....                                                        | 29 |
| 5.1   | The Course of Untreated Pneumonia .....                                        | 29 |
| 5.2   | Supplemental Details from the Tigecycline-Levofloxacin CABP Dataset .....      | 31 |
| 6     | Project Team Members .....                                                     | 33 |
| 7     | References .....                                                               | 34 |

## 32 **0 Executive Summary**

33  
34 During recent decades, the efficacy endpoints for Community-Acquired Bacterial Pneumonia  
35 (CABP) registrational studies relied on a clinical assessment of cure requiring “complete  
36 resolution of signs and symptoms” based on a combination of non-standardized physician-based  
37 observations and comments collected from the patient by the physician as well as on the  
38 investigator’s assessment of the need for alternative antibiotic therapy. As non-inferiority clinical  
39 trial design advanced during the late 20<sup>th</sup> and early 21<sup>st</sup> century, it became apparent to the FDA  
40 and others that the development of more readily quantifiable, reproducible, and externally  
41 verifiable endpoints would improve the design of present-day non-inferiority clinical trials for  
42 CABP.

43  
44 In developing updated approaches to endpoints, it was also recognized that outcome measures  
45 used for studies that support drug registration for CABP must be relevant for clinical practice.  
46 Although the level of detail and accuracy in measurement needed in the setting of clinical trials  
47 may differ from that needed in clinical practice, a description of the pivotal (Phase 3, or  
48 registrational) clinical trials as conducted is an integral part of the prescribing information and  
49 must be based directly on the trial data as collected and analyzed. The choice of primary  
50 endpoint for a trial may thus need to balance a variety of competing demands.

51  
52 In parallel discussions of the design of studies for skin infections, the idea arose that standardized  
53 assessments of patient response in CABP in the first few days of therapy might provide key  
54 insights into both drug effect and options for trial design (Food and Drug Administration 2010).  
55 Consequently, and at the request of FDA, in early May, 2010, the Foundation for the National  
56 Institutes of Health (FNIH) convened a Project Team for a Biomarkers Consortium Project  
57 entitled “Developing Endpoints for Clinical Trials of Drugs for Treatment of Acute Bacterial  
58 Skin and Skin Structure Infections and Community-Acquired Bacterial Pneumonia (Phases 1 and  
59 2). The Project Team membership included broad participation from NIH, FDA, the academic  
60 research community (including members of the Infectious Diseases Society of America (IDSA)),  
61 and interested biopharmaceutical companies.

62  
63 This document summarizes the work of the Biomarkers Consortium Project Team. Over a series  
64 of meetings the group reviewed the available historical and modern data and found that  
65 progressive improvement in four symptoms (cough, dyspnea, chest pain, and sputum production)  
66 during the first 4 days of therapy was sufficiently well documented that an early response  
67 endpoint measure could be proposed. To assess durability of response and other late events,  
68 supportive information should be obtained by assessing outcomes at a fixed timepoint after  
69 therapy has been completed. Such information could include a late response endpoint similar to  
70 the traditional test-of-cure endpoint. Although based on limited data and requiring further  
71 research, an early response endpoint can be used to anchor a non-inferiority trial for this  
72 indication. The early response endpoint is thus suggested for possible use by FDA in review of  
73 registrational trials and approval of applications in CABP while further research into this area is  
74 conducted.

75

## 76 **1 Introduction/ Background**

### 77 **1.1 Background**

78 Long known as the “Captain of the Men of Death,” Community-Acquired Bacterial Pneumonia  
79 (CABP) is a well-recognized and frequent syndrome (Spellberg, Talbot et al. 2008). Pneumonia  
80 remains the sixth leading cause of death in the United States and the number one cause of  
81 infectious disease-related death. Mortality rates in the pre-antibiotic era were often substantial  
82 (e.g., rates  $\geq 60\%$  were reported in patients  $\geq 60$  years of age) (Spellberg, Talbot et al. 2008), and  
83 even higher rates were reported for subsets such as patients with bacteremia (Fleming and  
84 Powers 2008). With the availability of effective antibiotics and advances in supportive care,  
85 mortality rates in the antibiotic era are reduced but still substantial at 10–20% (Ochoa-Gondar,  
86 Vila-Corcoles et al. 2008).

87  
88 Over the past decades, CABP has often been a key element of the initial registration indication(s)  
89 for new agents. Based on early observations that fever (core body temperature elevated above the  
90 normal range) in particular tended to resolve in just a few days with adequate therapy  
91 (Petersdorf, Cluff et al. 1957; el Moussaoui, Opmeer et al. 2006) vs. an average of 8-10 days  
92 (Osler 1910; Bullova 1937) in the pre-antibiotic era, resolution of fever (elevated core body  
93 temperature) as well as the more gradual resolution of pulmonary symptoms was used in many  
94 early reports as the basis for judging adequate efficacy. As subsequent antibiotics were  
95 introduced, trials relied on a clinical assessment of cure that required “complete resolution of  
96 signs and symptoms” based on a combination of non-standardized physician-based observations  
97 and comments collected from the patient by the physician as well as on the investigator’s  
98 assessment of the need for alternative antibiotic therapy.

99  
100 Approaches to endpoints in CABP that reduce dependence on physician-based observations or  
101 patient-based reporting have been considered but have to date been frustrated by practical issues.  
102 Mortality could be used as an endpoint in trials of CABP (Fleming and Powers 2008) (Spellberg,  
103 Fleming et al. 2008) and overall population mortality (10-20%) is theoretically high enough to  
104 support this approach (Ochoa-Gondar, Vila-Corcoles et al. 2008). However, the observed overall  
105 mortality rate includes patients who cannot be enrolled (e.g., those who died on or before  
106 hospital admission). As a result, the mortality rate of the enrolled patient population in recent  
107 trials has been  $\leq 5\%$ , a figure that is too low to make this endpoint practical (Pertel, Bernardo et  
108 al. 2008; Tanaseanu, Bergallo et al. 2008; Tanaseanu, Milutinovic et al. 2009). Placebo-  
109 controlled superiority-based designs are also not possible in the study of CABP because of the  
110 dramatic mortality and morbidity benefit of antibiotic treatment (Spellberg, Fleming et al. 2008).

111  
112 Thus, development of new agents for this indication has always relied on active-controlled non-  
113 inferiority studies using a clinical assessment of cure. As trials based on this approach have  
114 detected inferior agents (Pertel, Bernardo et al. 2008)) and as future trials will of necessity rely  
115 on comparative agents approved using this approach, a draft FDA Guidance for non-inferiority  
116 studies of CABP in which continued use of this approach was proposed in 2009 (Food and Drug  
117 Administration 2009, March).

118

119 Recent discussions regarding non-inferiority study design have, however, recognized the  
120 importance of improving the design of non-inferiority clinical trials for this indication. First, the  
121 “clinical response” endpoints used in prior CABP trials have depended upon a physician-based  
122 assessment and may also have included biomarkers that are not on the causal pathway of the  
123 disease. The composite of these various measures was left to clinician discretion. The concern is  
124 that this approach does not meet the regulatory criterion that endpoints must be “well-defined  
125 and reliable.” Endpoints must be either direct measures of how a patient functions, feels or  
126 survives or properly validated replacement endpoints for such measures in the appropriate  
127 context of use. In an effort to improve the strength of evidence when efficacy is evaluated in  
128 non-inferiority trial designs, work was thus undertaken to assess the clinical relevance of various  
129 endpoints, to better define those endpoints, and as well as to evaluate the optimal timing for the  
130 assessment of efficacy in patients with CABP.

131  
132 An additional particular focus for review was to provide strong estimates of treatment effect size  
133 relative to placebo therapy based on well-defined and reliable measures derived as closely as  
134 possible from patient-based information and taken at specific points in time. Having reliable  
135 estimates of treatment effect size is essential for a non-inferiority trial design. Although the  
136 historical evidence outlined above is consistent with a large effect, the available data are limited  
137 in that:

- 138  
139 1. The endpoints used in the historical trials do not specifically define the variables  
140 measured and the reliability of how they are measured, two fundamental components  
141 of endpoints for pivotal trials.
- 142 2. The data are incomplete and cannot be audited.
- 143 3. The data are taken from studies conducted many years ago, so their relevance to the  
144 modern clinical setting could be questioned. Since the time of these reports, there  
145 have been many changes in medical therapy such as improvements in supportive care  
146 and ready availability of antipyretics or anti-inflammatory agents which may alter  
147 treatment effects on biomarkers such as body temperature.
- 148 4. The data are not well controlled for severity of illness (or its potential to become  
149 severe) or baseline predictors of outcomes.
- 150 5. Development of biomarkers for use in chronic infections (Micheel, Ball et al. 2010)  
151 has led to the recognition that the biomarkers commonly used in acute infection  
152 should be evaluated carefully to ensure good linkage to underlying syndrome and  
153 evaluation and qualification of their use when used as outcome measures in clinical  
154 trials. Although both general biomarkers (core body temperature, heart rate) and  
155 disease-specific biomarkers (respiratory rate in pneumonia, erythema in skin  
156 infections) demonstrate supportive temporality and consistency, they are  
157 consequences of the infection rather than causes of the infection.
- 158 6. The data do not provide direct access to patient-based outcomes similar to those used  
159 in patient-reported outcome (PRO) tools.

160  
161 Physicians and patients have a natural interest in the overall outcome at the end of therapy and  
162 thereafter — the goal is resolution of the infection, no relapse, no late sequelae, and no  
163 significant adverse effects of the therapy itself. The traditional clinical trial Test-of-Cure (TOC)  
164 endpoint taken at a time after therapy has completed has had the goal of capturing all of these

165 elements, but in so doing it has incorporated a subjective decision-making element that makes it  
166 ill-defined from a regulatory perspective. Recognition of this potential ambiguity is useful for  
167 understanding the role that a novel regulatory endpoint might play in resolution of this problem.  
168

169 Specifically,  
170

- 171 1) The final patient state associated with the *traditional* TOC endpoint of “Cured” was  
172 characterized by the complete or near complete absence of symptoms associated with the  
173 infection and the return of relevant physiological parameters to normal (or premorbid status).  
174 Acceptance of a “near complete” absence of symptoms was justified in part by prior studies  
175 that showed that complete return to previous baseline status in CABP may take months,  
176 which is longer than the time point at which TOC measures have been obtained (Metlay,  
177 Atlas et al. 1998). While clinicians often express confidence in their ability to reliably define  
178 and measure near complete absence of symptoms in the setting of clinical practice and thus  
179 often consider such an endpoint to be well-defined when taken at a sufficiently late point in  
180 time, measures of improvement need to be clearly defined and quantified in the setting of  
181 clinical trials.  
182
- 183 2) Contributing reasons to the traditional TOC endpoint becoming ill-defined are the  
184 incorporation of components that either are not well-defined and reliable or are biomarkers  
185 where effects on these measures have not been shown to reliably predict effects on direct  
186 measures of how a patient feels, functions, or survives, and the inclusion of events that occur  
187 before the TOC endpoint. Although viewed as relevant by patients and physicians, such  
188 earlier events contain some subjective decision-making components.
  - 189 a) The decision to continue or discontinue study drug therapy, especially during the first  
190 few days of therapy.
  - 191 b) The decision to utilize salvage therapy.
  - 192 c) The observation (or not) of therapy-limiting adverse events.  
193
- 194 3) Thus, the patient’s state alone at the late time point of the traditional TOC endpoint may not  
195 be sensitive to study drug effects. As illustrated in Figure 1, both patients (a) and (b) could be  
196 judged as Cured at the TOC visit, but they reach this state in different ways:  
197

198 **Figure 1. Similar outcomes at a traditional late TOC visit, but different courses**

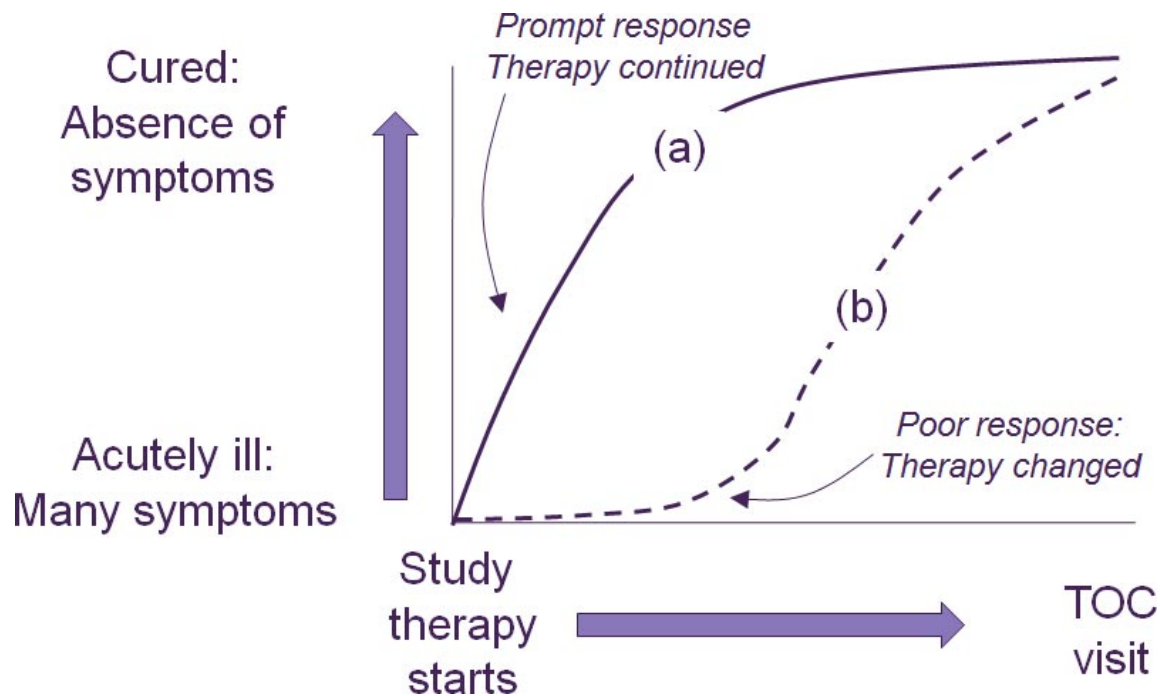

199  
200  
201  
202  
203  
204  
205  
206  
207  
208

New insights around the events that occur early in therapy and the possibility of a new early endpoint can contribute to addressing these problems. The work described in this document provides the basis for a consistent and objective description and documentation of the key early decision-making steps, thereby creating a well-defined approach to endpoints that capture and describe the overall effectiveness of study drug therapy (initial efficacy, sustained efficacy, and tolerability).

### 209 **1.2 Approach Taken by the Project Team**

210 At the request of FDA, in early May 2010 FNIH convened a Project Team with broad  
211 participation from NIH, FDA, the academic research community (including members of the  
212 Infectious Diseases Society of America (IDSA)), and interested biopharmaceutical companies to  
213 address the issues described above. The group has worked to develop a consensus on alternative  
214 primary and secondary endpoints that might improve the quality of future clinical trials of  
215 CABP.

216  
217 In developing updated approaches to endpoints, it was also recognized that outcome measures  
218 used for studies that support drug registration for CABP must be relevant for clinical practice.  
219 Although the level of detail and accuracy in measurement needed in the setting of clinical trials  
220 may differ from that needed in clinical practice, a description of the registrational (Phase 3)  
221 clinical trials as conducted is an integral part of the prescribing information and must be based  
222 directly on the trial data as collected and analyzed. The choice of primary endpoint for a trial  
223 may thus need to balance a variety of competing demands.  
224

225 It was thus agreed that the approach to developing such endpoints would involve two steps.

226  
227 First, available data would be used to develop a set of interim recommendations that would  
228 permit sponsors to continue development of drugs for this indication (and, consequently, that  
229 FDA would consider data based on these recommendations as pivotal data for review of  
230 applications for marketing authorization) (Phase 1). Second, a series of investigations would be  
231 undertaken into further possible improvements of endpoint measures and/or development of new  
232 measures (Phase 2). Such work might well benefit from incorporation of clinical trial data  
233 obtained using the interim recommendation endpoints as a starting point. Thus, improvements of  
234 endpoint measures would become available in the near future. The recommendations presented  
235 here are interim; they are based on currently available evidence, but there is an urgent need for  
236 further research to address the gaps in research elucidated during the Project Team's review.

237  
238 This initiative is particularly important at a time when the incidence of treatment-resistant  
239 pathogens is increasing (Boucher, Talbot et al. 2009). The recent slowdown in antimicrobial drug  
240 development and lack of clarity regarding regulatory requirements for registration of these  
241 important drugs adds further urgency to this undertaking.

242

## 243 **2 Summary of Project Team Process**

244 The members of the Project Team convened for a series of meetings during 2010 and 2011. Over  
245 the course of these meetings, the group discussed the historical literature, recent publications,  
246 and data from several available modern clinical studies. The group developed a consensus on a  
247 two-phase process to identify primary and secondary endpoints for ABSSSI (discussed  
248 separately) and CABP (this document).

### 249 **2.1 Phase 1: Retrospective Data Analyses**

250 The goal of this phase was to perform retrospective analyses of datasets from existing clinical  
251 studies to a) refine/confirm currently proposed outcome measures by determining how they  
252 performed in a modern clinical trial setting; b) help identify additional endpoints or biomarkers  
253 that might be relevant. The Project Team has identified several sources of data from existing  
254 modern industry clinical trials that have been used as an in-kind contribution to the project.

255  
256 These analyses, which have also been contributed in-kind to the project, have been based in each  
257 case on a statistical analysis plan (SAP) drafted by qualified biostatisticians who are part of the  
258 Project Team; each SAP was shared with the entire Project Team for comment and approval  
259 prior to initiating the analyses.

260

#### 261 **2.1.1 Summary of Existing Datasets**

##### 262 1. Historical data

263 a. Bullowa, J. G. M. (1937). Chapter II. The course, symptoms and physical findings.  
264 The management of pneumonias. New York, NY, Oxford University Press: 36-76.

265 b. Finland, M., W. C. Spring, et al. (1940). Immunological Studies on Patients with  
266 Pneumococccic Pneumonia Treated with Sulfapyridine. J Clin Invest 19(1): 179-99.

- 267 c. Flippin, H. F., J. S. Lockwood, et al. (1939). The treatment of pneumococcal  
268 pneumonia with sulfapyridine. JAMA-J Am Med Assn 112: 529-534.
- 269 d. Meakins, J. C. and F. R. Hanson (1939). The treatment of pneumococcal pneumonia  
270 with sulfapyridine. Can Med Assoc J 40: 333–6.
- 271 e. Osler, W. (1910). Specific infectious diseases: Lobar pneumonia. The Principles and  
272 Practice of Medicine. New York, D. Appleton and Company: 164-192.
- 273 f. Wilson, A. T., H. A. Spreen, et al. (1939). Sulfapyridine in the Treatment of  
274 Pneumonia in Infancy and Childhood. JAMA 112: 1435-1439.
- 275 g. Summary analyses of early antibiotic era data (Presentation by Mary Singer, 8 Dec  
276 2009 FDA AIDAC, available online at [www.fda.gov](http://www.fda.gov)).
- 277
- 278 2. Pfizer Pharmaceuticals generously provided the primary data tables from the clinical trials  
279 which the two comparative studies of tigecycline vs. levofloxacin which underpinned  
280 tigecycline’s approval for CABP:
- 281 a. Tanaseanu, C., C. Bergallo, et al. (2008). Integrated results of 2 phase 3 studies  
282 comparing tigecycline and levofloxacin in community-acquired pneumonia. Diagn  
283 Microbiol Infect Dis 61(3): 329-38.
- 284 b. Tanaseanu, C., S. Milutinovic, et al. (2009). Efficacy and safety of tigecycline versus  
285 levofloxacin for community-acquired pneumonia. BMC Pulm Med 9: 44.
- 286
- 287 3. Cubist Pharmaceuticals generously provided analyses of responses over time in the  
288 ceftriaxone arm from a study of daptomycin vs. ceftriaxone for CABP:
- 289 a. Pertel, P. E., P. Bernardo, et al. (2008). Effects of prior effective therapy on the  
290 efficacy of daptomycin and ceftriaxone for the treatment of community-acquired  
291 pneumonia. Clin Infect Dis 46(8): 1142-1151.
- 292
- 293 4. Both FDA and Cerexa, Inc. generously provided analyses from the two studies of ceftaroline  
294 vs. ceftriaxone which underpinned ceftaroline’s approval for CABP:
- 295 a. FDA Briefing document for 7 Sep 2010 AIDAC: Ceftaroline Fosamil for the  
296 Treatment of Community-acquired Bacterial Pneumonia and Complicated Skin and  
297 Skin Structure Infections. Available online at [www.fda.gov](http://www.fda.gov)
- 298 b. Cerexa Briefing document for 7 Sep 2010 AIDAC: Ceftaroline Fosamil for the  
299 Treatment of Community-acquired Bacterial Pneumonia and Complicated Skin and  
300 Skin Structure Infections. Available online at [www.fda.gov](http://www.fda.gov)
- 301

### 302 **2.1.2 Review of Historical Data**

303 A review of the course of untreated pneumonia provided a useful baseline against which to judge  
304 the clinical course of the disease in the modern era and also from which to draw insights into  
305 possible endpoints (see material summarized in Section 5.1). Reviews of work by Osler (Osler  
306 1910) and Bullova (Bullova 1937) provided illustrations of the typical course of symptoms  
307 associated with the syndrome of acute bacterial pneumonia, including cough, dyspnea, chest pain  
308 especially worsened with coughing, and expectoration of sputum. The patient would experience  
309 a steady deterioration during the early course of disease with progressive respiratory symptoms  
310 and change in mental status. If the patient survived, the initial sign of resolution would be a



311 drenching sweat after the eighth or ninth day (the “crisis”). Initial resolution was followed by  
312 onset of suppurative complications in some patients.

313  
314 Based on these data, a critical analysis of the course of illness in the untreated patient can be  
315 generated. Early in the course of illness, the untreated patient has fever (elevated core body  
316 temperature) and multiple respiratory symptoms. Prior-generation physicians wrote more about  
317 elevated body temperature because it was so obvious and because the day of the “crisis” was  
318 such an important clinical event. But, it is also clear that respiratory symptoms were prominent  
319 and progressive and that they also began to improve once the fever began to resolve. Osler  
320 describes this transition well when he writes, “After persisting for seven to ten days, the crisis  
321 occurs, and with a fall in the temperature the patient passes from the condition of extreme  
322 distress and anxiety to one of comparative comfort.” It is thus well documented that in the  
323 untreated patient, respiratory symptoms were not improved by day 3-4 but rather that steady  
324 deterioration could occur during this period.

325  
326 These results were contrasted with the experience in the early antibiotic era.<sup>1</sup> Based on data from  
327 the early antibiotic era (Flippin, Lockwood et al. 1939; Meakins and Hanson 1939; Wilson,  
328 Spreen et al. 1939; Finland, Spring et al. 1940), an antibacterial treatment effect using clinical  
329 recovery as an endpoint can be described. As described by early investigators in qualitative  
330 terms, the effect was rapid and striking (Flippin, Lockwood et al. 1939): “From the very  
331 beginning of this study, we have been impressed, as were Evans and Gaisford (1939), by the  
332 striking frequency with which the initiation of drug treatment was followed within 24 hours or  
333 less by a critical drop in the patient’s temperature. This temperature drop was not immediately  
334 accompanied by any significant changes in lung signs but always reflected a marked  
335 improvement in the toxemia and the general well being of the patient. Resolution of the  
336 pneumonia then followed within a variable period of days”.

337  
338 Using an endpoint characterized by a general improvement in the patient’s clinical condition as  
339 observed and recorded by the physician, substantial treatment effects can be estimated from these  
340 data:

- 341 • A quantitative estimate of treatment effect for symptom resolution at 48 to 72 hours is  
342 29% (95% confidence interval = 21-37%) (Finland, Spring et al. 1940).
- 343 • A quantitative estimate of treatment effect for clinical recovery at day 3 is 72% to 77%  
344 (Bullowa 1937; Flippin, Lockwood et al. 1939; Meakins and Hanson 1939).
- 345 • Quantitative estimates of treatment effect for mean days to clinical improvement, fall in  
346 temperature, and clinical recovery were 2.5, 3.4 and 4.2 days, respectively (Wilson,  
347 Spreen et al. 1939).

348  
349 Although these data suggest a significant effect of antibacterial agents, the data also have a  
350 number of limitations:

- 351 • The data are mostly observational or from small studies.
- 352 • Cross-study comparisons were used to determine treatment effect.
- 353 • The endpoints not clearly defined, but were clinically reasonable.

354

---

<sup>1</sup> Data adapted from a presentation by Mary Singer, 8 Dec 2009 FDA Anti-Infective Drugs Advisory Committee.

355 But, the studies also have counterbalancing strengths (they were contemporaneous; except for  
356 Finland’s 1940 study (Finland, Spring et al. 1940), mortality rates ranged from 3-7% in treated  
357 patients and were thus similar to mortality rates reported in contemporaneous controlled studies;  
358 the data were primarily from cases of pneumococcal disease). Taken together, this collection of  
359 pre-antibiotic and early antibiotic era data suggested a significant treatment effect at  
360 approximately day 3–4 after initiation of therapy. On this basis, an exploratory, hypothesis-  
361 generating analysis was undertaken of the tigecycline-levofloxacin CABP dataset in an effort to  
362 better define the variables measured in the “clinical response” endpoint.  
363

### 364 **2.1.3 Tigecycline vs. Levofloxacin - Hypothesis Generation**

365 In this phase of the work, data from the two pivotal trials underpinning the registration of  
366 tigecycline for CABP were analyzed (Tanaseanu, Bergallo et al. 2008; Tanaseanu, Milutinovic et  
367 al. 2009). These studies enrolled patients with an average age of 51 years with a distribution of  
368 PORT scores (I-V, microbiologic modified ITT [intention-to-treat] population) of 22%, 31%,  
369 27%, 19%, and 1%. In both studies, tigecycline was compared with levofloxacin as monotherapy  
370 for CABP. Patient-level data on the time course of four symptoms were available for analysis.  
371 Specifically, scores of absent, mild, moderate, or severe had been recorded for each of these four  
372 symptoms:

- 373 a. Cough
- 374 b. Pleuritic chest pain
- 375 c. Dyspnea
- 376 d. Sputum production

377  
378 Based on the idea that rapid symptom improvement might be expected early in the course of  
379 therapy (but not necessarily complete resolution over such a short period of time), a series of  
380 exploratory initial analyses focused on three possible definitions of response. The first two  
381 definitions sought to define the concept of “some symptom better with no other worse,” whereas  
382 the third definition measures disappearance of all symptoms:

- 383 a. The first day when some baseline symptom was better, with none of the other symptoms  
384 having become any worse.
- 385 b. The first day when some baseline symptom was now absent, with none of other  
386 symptoms having become any worse.
- 387 c. The first day when all symptoms were reported to be absent.

388  
389 Further analyses explored two types of “temporary responders”, that is, patients with initial  
390 response who did not maintain that response. Such patients were defined as either:

- 391 a. Patients with a response at Study Day<sup>2</sup> 3, 4, or 5, but with failure to maintain that  
392 response at all later times.

393 Or

---

<sup>2</sup> Throughout this document, Study Day 1 corresponds to the day of initiation of study therapy. An observation on Study Day 2 (usually the next calendar day) would be taken approximately 24h after initiation of therapy, an observation on Study Day 3 would be taken approximately 48h after therapy initiation, Study Day 4 would be taken approximately 72h after therapy initiation, and Study Day 5 would be taken approximately 120h after therapy initiation. The datasets discussed in this paper did not rigidly define specific time windows but rather appear to have followed a largely calendar-day based convention.

394 b. Patients with a response at Day 3, 4, or 5, but with a failure to maintain the response at  
395 the TOC visit.

396

397 Finally, the Project Team considered the possibility that endpoints with a stricter response  
398 definition might either reduce the problem of “temporary response” or offer a usefully different  
399 pattern of response over time. Thus, variant definitions of response along the scale of absent,  
400 mild, moderate or severe were also considered:

- 401 a. Any improvement from baseline in 2 of 4 symptoms, with none of other symptoms  
402 having become any worse.
- 403 b. A 2-point improvement (e.g. from severe to mild or moderate to absent) in one symptom,  
404 with none of other symptoms having become any worse.
- 405 c. A 2-point improvement in one symptom, a 1-point improvement (e.g. from severe to  
406 moderate or mild to absent) in another symptom, with none of other symptoms having  
407 become any worse.

408

409 These additional observations were relevant to understanding the available data:

- 410 a. Most patients had daily observations and measurements during the first 4 Days of  
411 therapy.
- 412 b. Subsequently, significant time gaps would span observations and measurements. As the  
413 exact Day of a change could not be estimated, missing observations were not replaced by  
414 last observation carried forward.
- 415 c. Most patients have a TOC and Late Follow-up (FU) data point, but these observations did  
416 not occur on the same Day for all patients. Thus, the number of observations on specific  
417 Days after about Day 5 becomes quite variable.
- 418 d. The highest number of observations was on Days 1-4, at the TOC visit, and at the FU  
419 visit.
- 420 e. Baseline findings for at least two symptoms (that is, a score of Mild, Moderate, or Severe  
421 rather than a score of Absent) were present in 96% of patients (See supplemental data in  
422 Section 5.2, Table 6) and thus most patients could be judged to improve based on a two-  
423 symptom rule. In addition, 93% of patients had a sufficient number of symptoms to meet  
424 a response rule requiring a 2-point change in at least one symptom and 91% had  
425 sufficient symptoms to meet a response rule requiring a 2-point change in one symptom  
426 accompanied by a 1-point change in another symptom.
- 427 f. Although the strength of symptom scores of Absent, Mild, Moderate, and Severe is  
428 limited by the lack of well-validated definitions, the Project Team believes that the  
429 perception that drives a change in category for an individual patient is likely to reflect a  
430 meaningful change in patient status. Further, the short duration of illness is likely to  
431 permit reasonable recall.

432

433 The core results are shown in Figure 2. In this graph, the y-axis shows the percentage of subjects  
434 meeting rules in which response meant improvement in one symptom by one point (solid line) or  
435 in two symptoms by one point (dashed line) with no worsening of any other symptom. As can be  
436 seen, rapid improvement can be documented during the first five Study Days based on analyses  
437 of these symptoms. This result appears similar to the qualitative descriptions of clinical response  
438 in the early antibiotic era literature.

439

440 **Figure 2: Improvement in CAP symptoms over Days 1-5, all patients**

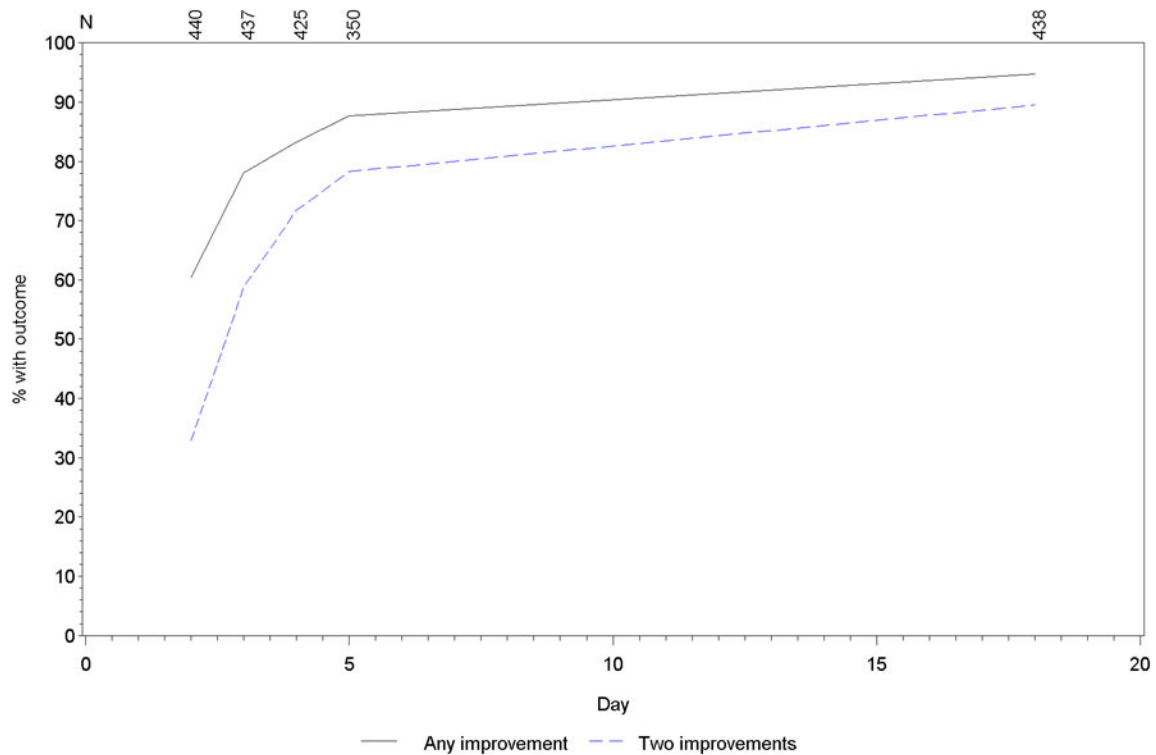

441  
442  
443

444 To aid with understanding how the new definitions performed in the context of the traditional  
445 TOC endpoint, supplemental analyses were performed for the subsets judged Cured vs. Failed at  
446 the traditional TOC endpoint (Section 5.2, Figure 4 and Figure 5). These analyses have a number  
447 of limitations (principally, they rely on the traditional TOC and its subjective elements which the  
448 Project Team seeks to avoid), but they proved useful during consideration (see below) of the  
449 choice of rule and time point that produced the least number of both temporary responses and  
450 responses that were discordant with the traditional endpoint.

451

452 The definition that was determined to offer the greatest merit was the one which required  
453 improvement in at least two symptoms, each by at least one point (that is, an improvement by  
454 one category such as from Moderate to Mild). As noted above, 96% of patients had sufficient  
455 baseline symptoms to permit them to meet the response criterion and the Project Team decided  
456 that improvement-in-two-symptom-categories supported a larger treatment effect that would  
457 correspond to clinically meaningful effects. Conclusions based on this definition were:

458

- 459 a) The requirement for improvement by at least one point in two symptoms yields  
460 improvement rates of 59, 72, and 78% on Days 3, 4, and 5 for all patients combined  
461 (Figure 2).
- 462
- 463 b) Agreement between the response at Days 3–5 with clinical cure/failure as judged at the  
464 traditional TOC visit was assessed as a guide to maximizing sensitivity to early treatment  
465 effect while also limiting the number of temporary responders (those showing an initial  
466 response meeting the rule but with subsequent worsening of symptoms):

- 467 i) Broadly, earlier times (Day 3) were better for limiting the number of patients who are  
 468 an early improver, but are ultimately classified to be a clinical failure at the TOC  
 469 visit. This conclusion appears biologically plausible but the data on this point are  
 470 limited by varying numbers of observations on each Day in this small dataset.  
 471 ii) Similarly and with the same limitations, later times (Day 5) were better for limiting  
 472 the number of patients who are an early non-improver, but who were ultimately  
 473 judged as a clinical cure at the TOC visit.  
 474 iii) Reasoning that failing to predict ultimate successful outcome is a lesser error than  
 475 incorrectly predicting success, earlier times (Days 3-4) overall seemed to offer the  
 476 best balance.  
 477  
 478 c) In summary, minimizing the number of patients who improve early and then are not  
 479 improved later was determined as most appropriate and is facilitated in this dataset by an  
 480 early evaluation at Days 3 and 4:  
 481 i) Improvement rates for ultimate clinical failures were minimized on these Days.  
 482 ii) Evaluation on these days minimized the number of patients showing improvement at  
 483 this time, but not subsequently classed as an improvement.  
 484

485 Two alternatives to the definition requiring a one-point improvement in at least two symptoms  
 486 were analyzed in parallel, with all three rules shown in Table 1. The Project Team also analyzed  
 487 the frequency with which an initial response was not sustained as judged by failure to meet the  
 488 same rule at the TOC visit (Table 2).  
 489

490 **Table 1: Response rates for three possible response definitions**

| Day   | One-point improvement in two symptoms | Two-point improvement in one symptom | Two-point improvement in symptom, one-point improvement in another symptom |
|-------|---------------------------------------|--------------------------------------|----------------------------------------------------------------------------|
| Day 3 | 257/437 (59%)                         | 155/437 (35%)                        | 138/437 (32%)                                                              |
| Day 4 | 305/425 (72%)                         | 209/425 (49%)                        | 193/425 (45%)                                                              |
| Day 5 | 274/350 (78%)                         | 203/350 (58%)                        | 192/350 (55%)                                                              |

491  
 492 **Table 2: Rates of temporary improvement - Met the response rule at an early time point**  
 493 **but not at TOC**

| Day   | One-point improvement in two symptoms | Two-point improvement in one symptom | Two-point improvement in symptom, one-point improvement in another symptom |
|-------|---------------------------------------|--------------------------------------|----------------------------------------------------------------------------|
| Day 3 | 10/251 (4%)                           | 7/149 (5%)                           | 7/134 (5%)                                                                 |
| Day 4 | 8/300 (3%)                            | 8/204 (4%)                           | 7/190 (4%)                                                                 |
| Day 5 | 10/271 (4%)                           | 4/199 (2%)                           | 6/190 (3%)                                                                 |

494  
 495 Overall, the definition of early response requiring a one-point improvement in at least two  
 496 symptoms overall appeared most consistent with both TOC data and the prior descriptions of  
 497 antibiotic response. Despite the above-discussed limitations of the TOC endpoint, the Project  
 498 Team felt that given these evaluations looked specifically at symptom improvement, considering

499 the correlation of early and late response was an appropriate way to use all of the available  
500 information to calibrate the proposed early endpoint rules.

501  
502 The Project Team discussed at length the merits of the alternative rules. Although the greater  
503 stringency of the two-point improvement endpoints might offer greater sensitivity to treatment  
504 effects, some members of the Project Team thought these were more difficult to interpret. First,  
505 they were concerned that it is not clear what a two-point change means. Second, response rates  
506 based on a two-point improvement were lower than seemed clinically plausible. Finally, the one-  
507 point improvement concept is similar to the idea of “Any improvement” and might be considered  
508 a simpler definition to understand and use.

509  
510 Finally, all three endpoints had relatively low (<5%) and similar rates of temporary  
511 improvement. Discordance rates for only those patients successful at TOC were similar to those  
512 above for all patients combined. Discordance rates in those unsuccessful at TOC were difficult to  
513 interpret due to low numbers — the absolute number of discordant patients in this group was  
514 low.

515  
516 Based on these discussions, the Project Team concluded that the one-point-improvement-in-two-  
517 symptoms rule was a reasonable approach but that alternative rules could be (re)considered and  
518 developed as additional data become available.

519

## 520 **Conclusions From This Analysis**

- 521 1) This analysis of the three definitions and the reliability of the early response measure suggest  
522 that a one-point improvement in two symptoms at Day 3, 4, or 5 should be the focus of  
523 further analysis when symptoms are classified on a four-point scale consisting of absent,  
524 mild, moderate, severe.
- 525 2) Alternative approaches were possible but were considered to present obstacles that were  
526 greater than those posed by the consensus endpoint definition.
- 527 3) The two-point improvement definitions included the issue that defining a two-point change is  
528 a more challenging hurdle to meet and all two-point improvements may not be equal.  
529 Although all one-point improvements may as well not be equal, a one-point improvement  
530 could be taken as a meaningful step from the patient’s perspective and a pair of such  
531 improvements for two different symptoms was likely a strong finding. Future research is  
532 needed to better define responder criteria.
- 533 4) In addition, response rates based on a two-point improvement were in a range (ca. 50%) that  
534 would require substantially larger clinical trial sample sizes than those required for response  
535 rates closer to 70–80%. The Project Team discussed the possibility of selecting the rule based  
536 on its impact on sample size but could only conclude that further research was required on  
537 that point.
- 538 5) “Any improvement” could be considered a simpler definition to understand and use.
- 539 6) All three definitions of the endpoints had relatively low and similar rates of temporary  
540 improvement, so the choice of definition was not a factor in discordance.
- 541 7) In terms of the timing of the outcome assessment, Days 4 and 5 had higher response rates  
542 with similar levels of discordant responses.
- 543 8) No data are available on the content validity or reliability of the scale used in this analysis;  
544 however, the analysis of the presented data in this form was used to understand the disease

- 545 pattern. Future research would help to evaluate the content validity, understandability to  
546 patients and reliability of scales.
- 547 a) Although scale reliability had not been validated, it was noted that the short duration of  
548 the illness would facilitate accurate day-to-day comparison by the patient and that change  
549 in rating level was likely to reflect the course of the illness. The validity of this  
550 assumption should be studied in future research.
  - 551 b) Some members of the Project Team noted that although the use of this scale was  
552 appropriate, the terminology for Mild, Moderate, Severe, and Absent needed better and  
553 more precise definition.
- 554 9) The available data indicated that most patients with CABP receiving effective therapy  
555 demonstrate a two-symptom improvement, each by at least one point.

#### 556 **2.1.4 Analysis of Ceftriaxone Treatment Data - Limited Hypothesis Testing**

557 Using the ideas developed from investigation of the tigecycline-levofloxacin analysis, an  
558 analysis plan was developed for the ceftriaxone data from the ceftriaxone-daptomycin CABP  
559 trial (Pertel, Bernardo et al. 2008):

560  
561 In brief, two CABP studies were conducted with daptomycin (Cubicin, formerly Cidecin) vs.  
562 ceftriaxone. Of these, the first was completed in 2000 and the data from the ceftriaxone arm were  
563 generously made available for this analysis. The second study was stopped when the results of  
564 the first study's results became available.

565  
566 In this study, the mean age of the enrolled patients in the ITT ceftriaxone group was 56 years  
567 with a PORT Risk Class distribution (I-V) of 0%, 44%, 30%, 27%, and 0% (Pertel, Bernardo et  
568 al. 2008). The same four symptoms as previously analyzed (cough, chest pain, dyspnea, and  
569 sputum production) were serially recorded for each patient. A weakness of this dataset is that  
570 symptoms are only recorded as present or absent. A further weakness is the small number of  
571 failures in the ceftriaxone arm. Thus, the exploratory analysis provides only limited hypothesis  
572 testing. Although the definition used in the study protocol and presented to investigators was to  
573 evaluate "improvement" in symptoms, the case report forms did not conform with this definition  
574 since investigators were only offered the choices of "present" or "absent" for each symptom.

575  
576 Of the evaluable population of 286 patients, 97.6% had two or more symptoms at baseline.  
577 Overall, 81.1% of subjects had at least one symptom resolve by Day 4 and 58.1% had at least  
578 two symptoms resolve by Day 5 (Table 3). Similar to prior observations (Metlay, Fine et al.  
579 1997), cough took longer to resolve than other symptoms. For example, in the subset of patients  
580 with at least one symptom eradicated, only 30% had cough resolved by Day 5, whereas 60, 52,  
581 and 66% of patients have resolution of dyspnea, chest pain, and sputum production, respectively  
582 (Table 4). A similar pattern was observed in the subset with recorded resolution of at least two  
583 symptoms (Table 5).

584  
585

586 **Table 3. Number of symptoms resolved by Study Day**

| Study Day | Resolution of at least one symptom | Resolution of at least two symptoms |
|-----------|------------------------------------|-------------------------------------|
| 3         | 193/286 (67.5%)                    | 67/279 (24.0%)                      |
| 4         | 232/286 (81.1%)                    | 127/279 (45.5%)                     |
| 5         | 243/286 (85.0%)                    | 162/279 (58.1%)                     |

587  
588 **Table 4. Timing of resolution of at least one symptom**

| Study Day | N with at least <u>ONE</u> symptom eradicated | Cough eradicated (%) <sup>a</sup> | Dyspnea eradicated (%) <sup>a</sup> | Chest pain eradicated (%) <sup>a</sup> | Sputum production eradicated (%) <sup>a</sup> |
|-----------|-----------------------------------------------|-----------------------------------|-------------------------------------|----------------------------------------|-----------------------------------------------|
| 3         | 193/286 (67.5%)                               | 18 (9)                            | 91 (47)                             | 75 (39)                                | 103 (53)                                      |
| 4         | 232/286 (81.1%)                               | 44 (19)                           | 126 (54)                            | 111 (48)                               | 143 (62)                                      |
| 5         | 243/286 (85.0%)                               | 73 (30)                           | 145 (60)                            | 126 (52)                               | 161 (66)                                      |

589 <sup>a</sup>Data in these columns show n eradicating the given symptom / N eradicating at least one  
590 symptom (%)

591  
592 **Table 5. Timing of resolution of at least two symptoms**

| Study Day | N with at least <u>TWO</u> symptoms eradicated | Cough eradicated (%) <sup>a</sup> | Dyspnea eradicated (%) <sup>a</sup> | Chest pain eradicated (%) <sup>a</sup> | Sputum production eradicated (%) <sup>a</sup> |
|-----------|------------------------------------------------|-----------------------------------|-------------------------------------|----------------------------------------|-----------------------------------------------|
| 3         | 67/279 (24.0%)                                 | 17 (25)                           | 50 (75)                             | 47 (70)                                | 47 (70)                                       |
| 4         | 127/279 (45.5%)                                | 42 (33)                           | 91 (72)                             | 85 (67)                                | 97 (77)                                       |
| 5         | 162/279 (58.1%)                                | 71 (44)                           | 114 (70)                            | 106 (65)                               | 128 (79)                                      |

593 <sup>a</sup>Data in these columns show n eradicating the given symptom / N eradicating at least one  
594 symptom (%)

595  
596 **Relationship between Symptom Resolution and Clinical Outcome.** The sensitivity and the  
597 specificity of at least one symptom vs. two symptoms resolved were assessed. To evaluate  
598 sensitivity, the cure rates and the percentage of patients who had at least two symptoms resolved  
599 were of interest. Of those classified as a cure at the TOC visit, 82% had at least one symptom  
600 resolved by Day 4. However, 82% of those classified as a failure at TOC likewise had at least  
601 one symptom resolve. On the other hand, 62% of the patients judged to be a cure at TOC had at  
602 least two symptoms resolved on study Day 5 vs. only 18% of subjects ultimately judged to be a  
603 failure. Once again, such analyses must be interpreted with caution since “cure at TOC” is used  
604 as the “gold standard” in such comparisons, even though it has not been established to be a  
605 validated surrogate endpoint for long-term resolution of symptoms.

606  
607 **Characteristics of Four Failed Patients with at Least Two Symptoms Resolved.** The patients  
608 who were classified as a failure but had at least two symptoms resolved were evaluated more  
609 closely. Three of the failed patients each had a persistence or progression of radiographic  
610 abnormalities (a pre-specified “failure” definition) at TOC. Patient 1 improved over time and  
611 symptoms resolved from Days 3–5, but the patient had persistence or progression of radiographic  
612 abnormalities at the TOC visit. Patient 2 had sporadic improvement and a normal chest  
613 radiograph at TOC. Patient 3 had chest pain and cough that were resolved at Day 5 but came



614 back at the TOC; this patient also had persistence or progression of radiographic abnormalities.  
615 These discrepancies should not be over-interpreted and could have been due to worsening of a  
616 baseline symptom or the presence of symptoms outside those recorded. The final patient showed  
617 resolution according both to the study definition on study Days 3–5 and based on the symptom  
618 data at TOC follow-up; there was no clear reason why this person failed in the disposition data  
619 set. However, this patient had a medley of other problems and was taking several concomitant  
620 medications including some potentially effective antibiotics. As for the first three patients, other  
621 symptoms could have worsened or been present at baseline and resulted in the failure  
622 classification.

623

### 624 **Conclusions From Review of the Ceftriaxone Dataset**

- 625 • The data are limited by recording of only present/absent for each symptom and do not  
626 correspond to the study protocol’s definitions for improvement.
- 627 • The number of patients with symptoms of interest at baseline is similar to what was observed  
628 previously: 98% of patients had two or more symptoms at baseline.
- 629 • Symptoms at baseline were similar for patients who were classified as cure or failure.
- 630 • With the caveats noted above regarding the meaning of the TOC assessment, one-symptom  
631 resolution did not correlate well with an assessment at the TOC visit. On the other hand, two-  
632 symptom resolution had a broad, general agreement with the TOC assessment and with the  
633 analysis of the levofloxacin-tigecycline dataset.
- 634 • Three of four failures (75%) who did show resolution of two or more symptoms on Day 5  
635 had persistence or progression of radiographic abnormalities.
- 636 • Forty percent of patients who were an investigator-determined cure at TOC did not have two  
637 or more symptoms resolved from baseline by Study Day 5. In particular, cough was noted to  
638 be a persistent symptom that did not resolve completely with antibiotic therapy during the  
639 usual observation period.
- 640 • Overall, these findings are consistent with the observation from the tigecycline-levofloxacin  
641 data set that improvement of two or more symptoms on approximately Day 4 of therapy  
642 (approximately 72h into the course of therapy) is indicative of response to therapy.

643

### 644 **2.1.5 Analyses Undertaken During Review of the Ceftaroline Phase 3 CABP** 645 **Studies**

646 The FDA has recently reviewed two phase 3 non-inferiority trials compared ceftaroline with  
647 ceftriaxone in the treatment of adults with CABP and on the basis approved ceftaroline for this  
648 indication. Enrolled subjects had mean age of 61 years with 62% of the subjects in PORT  
649 category III and 38% in PORT category IV.

650

651 As noted in the FDA-approved prescribing information, “To evaluate the treatment effect of  
652 ceftaroline, an analysis was conducted in CABP patients for whom the treatment effect of  
653 antibacterial agents may be supported by historical evidence. The analysis endpoint required  
654 subjects to meet signs and symptoms criteria at Day 4 of therapy: A responder had to both (a) be  
655 in stable condition according to consensus treatment guidelines of the Infectious Diseases  
656 Society of America and American Thoracic Society, based on temperature, heart rate, respiratory  
657 rate, blood pressure, oxygen saturation, and mental status (Mandell, Wunderink et al. 2007); (b)

658 show improvement from baseline on at least one symptom of cough, dyspnea, pleuritic chest  
659 pain, or sputum production, while not worsening on any of these four symptoms.”

660  
661 The response rates at study Day 4 for microbiologically evaluable patients were 69.6% and  
662 69.0% for ceftaroline and 58.3 and 61.4% for ceftriaxone for trials 1 and 2, respectively.  
663

664 The FDA reviewers also suggested that knowing whether the clinician was assessing stability  
665 based on the above-noted definition at that earlier time point could help in the evaluation of  
666 efficacy as a measure in addition to symptoms and evaluated separately (not as a composite  
667 outcome measure). FDA evaluated the literature that IDSA/ATS has published on the criteria for  
668 establishing stability. These objective criteria for stability (body temperature  $\leq 37.8$  °C, pulse  $\leq$   
669 100 beats per minute, respiratory rate  $\leq 24$  breaths per minute, stable blood pressure  $\geq 90$  mm  
670 Hg, oxygen saturation  $\geq 90\%$ , and normal mental status) have been suggested as a means to help  
671 clinicians understand when it is appropriate to discharge a patient from the hospital. Although  
672 only one element of this definition is directly tied to how a patient feels or functions (normal  
673 mental status), the FDA view parallels the practical clinical sense that these measurements are  
674 directly tied to the historical data on response and can serve to support a non-inferiority margin.  
675 The quantitative relationship between biomarkers and symptoms is an area that needs further  
676 research, as correlations between biomarkers and outcomes of how patients feel, function and  
677 survive may represent a useful starting point but are insufficient to evaluate and qualify  
678 biomarkers as outcome measures.  
679

680 As also stated in the FDA-approved prescribing information, FDA concluded that the historical  
681 data available at the time of this drug’s review were insufficient to establish the magnitude of the  
682 drug effect for antibacterial drugs using clinical response at the TOC time point. However, the  
683 FDA review team determined that the product label should provide a full description of the entire  
684 course of treatment for CABP. The protocol-specified analyses in the CABP trials included the  
685 clinical cure rate at the test of cure (TOC) visit (8–15 days after treatment ended).  
686

#### 687 **Conclusions From Review of the Ceftaroline US FDA CABP Registration Dataset**

- 688 • A recent drug registration has been based on a response definition based on (a) achieving  
689 clinical stability based on temperature, heart rate, respiratory rate, blood pressure, oxygen  
690 saturation, and mental status (Mandell, Wunderink et al. 2007) and (b) showing improvement  
691 from baseline on at least one symptom of cough, dyspnea, pleuritic chest pain, or sputum  
692 production, while not worsening on any of these four symptoms.
- 693 • In this analysis, improvement at Day 4 of symptoms along with stabilization of signs over the  
694 previous 24 hours was thought to be a reasonable choice of time for assessing the endpoint.  
695 But, Day 3 or 5 could perhaps also be used pending further analysis.
- 696 • The use of the early endpoint presumes that there is a later secondary outcome measure that  
697 captures overall outcome; relevant measurements such as temperature, respiratory rate, blood  
698 pressure, and oxygenation should be approached as supportive secondary measurements, and  
699 the IDSA/ATS guidelines provide a good reference for clinical stability based on vital sign  
700 measurements.

701  
702

703 **2.1.6 Data Not Yet Available and Needed for Project Team’s Final**  
704 **Recommendations**

705  
706 (Please also refer to Section 2.2)

707  
708 As summarized below, these analyses demonstrate the potential value of an early endpoint  
709 measure that is based on the symptoms of cough, chest pain, dyspnea, and sputum production.  
710 As demonstrated by the analysis of the ceftaroline registrational dataset, resolution of these  
711 symptoms in combination with demonstration of physiological stability (the temperature, heart  
712 rate, respiratory rate, blood pressure, oxygen saturation, and mental status stability parameters  
713 discussed above) offers an endpoint that offers advantages of a strong link to historical evidence  
714 of a substantial antibiotic treatment effect size relative to placebo and an objective approach to  
715 documenting improvement of the patient symptoms.

716  
717 Although there are gaps in our knowledge regarding such an endpoint, the consensus opinion of  
718 the Project Team is that an endpoint based on these ideas could be used now to enable trials to  
719 proceed in this area. Additional work is needed to refine our understanding of such an endpoint,  
720 but there is a critical need for a bridge period with the use of interim efficacy endpoints. Thus,  
721 the ideas in this document are recommended for immediate use.

722  
723 For the future, however, areas that require further clarification are

- 724 • Specific enrollment criteria
- 725 • Identification of alternative endpoints, including those that might be suitable for  
726 assessing response in patients with greater or lesser degrees of baseline severity of  
727 illness and symptoms. For example, critically ill patients may not be able to provide  
728 direct reporting on their symptoms.
- 729 • Are symptoms other than the four identified from these data relevant? Can the simple  
730 scoring scheme of Absent, Mild, Moderate, and Severe be better defined or made  
731 more robust?
- 732 • An approach to the important measures of clinical stability based on the temperature,  
733 heart rate, respiratory rate, blood pressure, oxygen saturation, and mental status  
734 stability parameters discussed above needs to be developed. Principally composed of  
735 physiological biomarkers, the FDA’s approach to the ceftaroline dataset evaluated  
736 these relevant measures as elements of a composite outcome measure in that therapy  
737 was required to demonstrate an effect on symptoms as well as these related measures.  
738 Is this the most informative approach? The data that group evaluated showed that this  
739 would lower overall success rates as measured in current trials.
- 740 • Selection of the optimum time(s) for endpoint evaluation.
- 741 • Are alternative endpoint rules needed for drugs of other classes? The Project Team  
742 recognized that the data were derived based on drugs from a limited number of  
743 classes (beta-lactams, fluoroquinolones, and tetracyclines), that the pace of response  
744 might vary among drug classes, and that the endpoint rule might need to be  
745 reconsidered in the future as additional data for other drug classes become available.

746

## 747 **2.1.7 Conclusions**

748

- 749 1) There is strong support that an early clinical endpoint (e.g. Day 4, see below) of symptom  
750 improvement gives relevant data on how a patient feels and functions and provides evidence  
751 of a strong treatment effect size for antibiotics via its link to less well-defined assessments of  
752 symptom improvement in historical studies.
- 753 2) The four symptoms identified in the review to date (cough, pleuritic chest pain, dyspnea, and  
754 sputum production scored as Absent, Mild, Moderate, and Severe) are biologically relevant  
755 to the disease and are recommended. It may be possible to utilize other symptoms, but  
756 including others would require a new definition for what is considered a success and new  
757 datasets for analysis. Evaluations of whether all relevant symptoms are included in current  
758 definitions should be a focus for future research.
- 759 3) The overall measure proposed at present by the Project Team builds on these three elements:  
760 a) A one-point improvement in at least two symptoms and  
761 b) No worsening of any other symptoms with  
762 c) The assessment made on study Day<sup>3</sup> 4.
- 763 4) Assessment at Days 3 and/or 5 is also plausible, but measures at these times were more often  
764 discordant with overall clinical response in the available dataset. This finding is not robust as  
765 the differences may have been in part due to different numbers of observations on each Day.  
766 The extent of discordance is also dependent upon the response definition. Thus, Day 4 should  
767 be viewed as reasonable choice but also one that could be challenged by future data.
- 768 5) Of note, the proposed early clinical endpoint does not consider other interim events. Subjects  
769 who die before the Day 4 endpoint would lack data showing improvement and would of  
770 course be judged as Non-Responders. However, subjects who required a change in therapy  
771 due to a complication or adverse event might be judged at the early response timepoint as a  
772 Responder if initiation of alternative therapy produced an adequate response by Day 4.  
773 Although one might expect someone who received alternative therapy to be scored as a Non-  
774 Responder, the Project Team proposes scoring the early response measure based solely on  
775 clinical response. As the Project Team expects such discordant situations to be uncommon,  
776 the numerical impact on the early response endpoint should be insignificant. This type of  
777 event should be identified in secondary analyses.
- 778 6) There are important alternative viewpoints on the use of the proposed endpoint. In brief, the  
779 concerns focus on the limited data to support the new endpoint, the early endpoint's inability  
780 to capture the entire treatment course, and the potential challenge of using this endpoint in

---

<sup>3</sup> Throughout this document, Study Day 1 corresponds to the day of initiation of study therapy. An observation on Study Day 2 (usually the next calendar day) would be taken approximately 24h after initiation of therapy, an observation on Study Day 3 would be taken approximately 48h after therapy initiation, Study Day 4 would be approximately 72h after therapy initiation, and Study Day 5 would be approximately 120h after therapy initiation. The datasets discussed in this paper did not rigidly define specific time windows but rather appear to have followed a largely calendar-day based convention.

781 parallel with other endpoints as part of a global development program. These are discussed in  
782 detail in Section 3.2.  
783

## 784 **2.2 Phase 2: Qualitative Research Phase**

785 The review of the available data by the Project Team revealed several research gaps in both  
786 defining all the relevant symptoms of importance to patients and in evaluating the reliability of  
787 measurements of patient symptoms. While it is critical to develop interim recommendations to  
788 allow drug development to proceed, it is equally critical to perform research to evaluate the  
789 validity and reliability of these recommendations or to improve upon them if needed. This  
790 research should be performed in as a timely a fashion as possible. It is planned that one or more  
791 research firms will be selected through a formal RFP process to complete a qualitative research  
792 phase of instrument development that would be based on both literature searches and patient  
793 interviews. This work might lead to improved outcome measures for future clinical trials in  
794 CABP.

795  
796 The proposed studies will be conducted by a group of researchers highly experienced in the field  
797 of infectious disease, and will be guided by a Project Team that includes academic clinicians,  
798 drug development personnel from pharmaceutical companies, and representatives from the NIH,  
799 and the FDA.

800  
801 Results from the retrospective clinical trial analyses and qualitative research studies will be used  
802 as input to designing prospective clinical studies to be conducted as part of a potential Phase 3,  
803 which would be proposed as a separate Biomarkers Consortium project and be focused on the  
804 design and conduct of one or more clinical studies to further test and validate specific endpoints  
805 and measurement approaches. While a standalone study cannot be ruled out, it is expected that  
806 these later studies will be able to be coordinated as companion studies to current trials being  
807 conducted by NIAID (National Institutes of Allergy and Infectious Diseases) or industry.  
808

## 809 **3 Interim Recommendations**

### 810 **3.1 Description of an Early Endpoint**

- 811 1) Study design
- 812 a) Most studies comparing one active agent with another would be of a non-inferiority  
813 design due to ethical and feasibility issues.
  - 814 b) Superiority trials are difficult to implement for serious or life-threatening infections  
815 unless there are no other active agents available. The one exception is add-on studies in  
816 which a second active agent is added to the base regimen, but achieving a superior effect  
817 over a fully dosed and active base regimen would be unlikely in setting where there is  
818 already effective therapy.
  - 819 c) Dose-response and placebo-controlled superiority study designs could be used in selected  
820 mild infections. Specific situations such as randomized dose-response trials and  
821 combination therapy trials do offer the tantalizing possibility of providing data on which  
822 to base the design of future non-inferiority trials.

- 823 d) However, an additional limitation is that the subjects who can be enrolled may have such  
824 limited and mild infection that the results cannot be generalized beyond the context of use  
825 in the given clinical trial to other patient groups with more severe forms of the illness.  
826 e) Note that novel well-defined, reliable, and clinically meaningful endpoints can be used in  
827 superiority trials since there is no requirement for evidence of treatment effect from prior  
828 studies to evaluate assay sensitivity in the setting of superiority trials.
- 829 2) Endpoints
- 830 a) Early assessment at Study Day 4, approximately 72h<sup>4</sup> after baseline measurement at time  
831 of randomization and treatment initiation, supports treatment effect by demonstration of  
832 i) A one-point improvement in at least two symptoms and  
833 ii) No worsening of any other symptoms  
834 iii) Where symptoms are Cough, Dyspnea, Pleuritic Chest Pain, and Sputum Production  
835 iv) And symptoms are scored as Absent (or none), Mild, Moderate, and or Severe.
- 836 b) Later assessment at a fixed time point after initiation of therapy
- 837 i) The Project Team did not debate the precise requirements for a later assessment  
838 endpoint and identified this as a topic for future research. Typical elements from prior  
839 studies would include
- 840 (1) Survival,  
841 (2) Improvement (or resolution) of the clinical signs that are part of the early  
842 assessment endpoint,  
843 (3) Lack of a requirement for modification of therapy, and  
844 (4) Lack of adverse events leading to discontinuation of therapy.
- 845 ii) The late assessment might or might not include a requirement to have been judged a  
846 Responder at the early endpoint (see the discussion on Alternative Viewpoints  
847 (Section 3.2).
- 848 iii) To address the need for international harmonization of clinical trial design, the late  
849 endpoint could in fact be two time points; one at the end of therapy (EOT) and the  
850 other at an off-therapy (i.e., TOC) time point.
- 851 iv) The best time(s) for the late endpoint(s) should be determined depending on the  
852 maximum length of treatment, the pharmacokinetic (PK)/pharmacodynamic  
853 characteristics of the drug, and the characteristics of the comparator agent.
- 854 v) Assessments should be made at a fixed time point relative to the baseline  
855 measurement and study initiation that is the same across patients.
- 856 vi) Collection of sufficient PK data to estimate individual subject drug exposure would  
857 allow for more complete exposure-response analyses for both early and late  
858 endpoints.
- 859 c) Absence of elevated body temperature is not recommended as part of the early endpoint  
860 since it may be confounded by antipyretic therapy. Although persistent fever is  
861 occasionally due to a non-infectious cause such as drug-related fever, overall successful  
862 response without resolution of elevated body temperature would be unusual and its

---

<sup>4</sup> Throughout this document, Study Day 1 corresponds to the day of initiation of study therapy. An observation on Study Day 2 (usually the next calendar day) would be taken approximately 24h after initiation of therapy, an observation on Study Day 3 would be taken approximately 48h after therapy initiation, Study Day 4 would be approximately 72h after therapy initiation, and Study Day 5 would be approximately 120h after therapy initiation. The datasets discussed in this paper did not rigidly define specific time windows but rather appear to have followed a largely calendar-day based convention.

- 863 resolution is of interest to patients and physicians. It should thus be included as a  
864 sensitivity analysis and/or as part of a late assessment endpoint.
- 865 d) Parallel with the just-discussed issue of the resolution of elevated body temperature,  
866 improvement in the important measures of physiological clinical stability (e.g., the  
867 parameters suggested by the IDSA/ATS guidelines (Mandell, Wunderink et al. 2007))  
868 would be expected but is not specifically part of the symptom-based endpoint described  
869 in this work. A conclusion of response based on symptoms without simultaneous  
870 achievement of such clinical stability would be unusual and would suggest an inter-  
871 current second process.
- 872 3) Study enrollment criteria
- 873 a) This issue was outside of the scope of this project and was not discussed in detail by the  
874 Project Team. Diagnostic criteria similar to those in the March 2009 FDA Draft CABP  
875 guidance (Food and Drug Administration 2009, March) were presumed during Project  
876 Team discussions with key elements of standard clinical symptoms and PORT Risk Class  
877 of III or more. The issue of exclusion due to prior receipt of effective antibiotics was not  
878 analyzed by the Project Team. Likewise, the sample size challenge created by limiting  
879 the primary analysis to the microbiologically proven subset of patients was not discussed  
880 by the Project Team.
- 881 b) As the proposed response endpoint rule requires improvement of at least one point for  
882 two symptoms, a minimum of two symptoms are required for study entry.
- 883 4) Although outside of the scope of this project and not discussed in detail by the Project Team,  
884 it was noted that late response should be assessed at fixed time points post-randomization or  
885 initiation of therapy to ensure a consistent duration of assessment time for successes and  
886 failures.
- 887 5) Proposed non-inferiority margin if applicable: This topic was not specifically discussed by  
888 the Project Team.
- 889 6) Sample size considerations: This topic was not specifically discussed by the Project Team.
- 890 7) Opportunities for harmonization globally
- 891 a) See discussion above regarding choice of primary endpoint. These data could be  
892 presented to regulatory authorities in other countries for their evaluation. FDA members  
893 of the review group have offered to share these analyses with other regulatory agencies
- 894 8) Studies/ data needed to advance to final recommendations and timeframe for accomplishing  
895 same: Phase 2 data as described above.  
896

897 **3.2 Alternative Viewpoints, Issues, Limitations, and Areas for Future**  
898 **Work**

899 There are alternative viewpoints within the Project Team regarding the conclusion that the  
900 primary measure should be taken at Day 4 of therapy. Although there was agreement among  
901 team members that the early measurement provided important information, some concerns were  
902 raised and should also be addressed in future research:

- 903
- 904 a) ***These endpoints rely in part on data from a very different medical era.*** Although  
905 biologically plausible, the specific proposal developed for elements of the proposed early  
906 endpoint is based on a small number of datasets, some of which are very old and which  
907 represent medical experience during an era that provided very different levels of supportive  
908 care.
- 909
- 910 b) ***Currently available agents are active for life-threatening infections such as CABP.***  
911 Although there are demonstrated instances of detection of differences in efficacy or safety  
912 among agents for life-threatening infections as well as instances of detection of ineffective  
913 agents that were not subsequently registered for the given indication (e.g., daptomycin for  
914 pneumonia), currently available agents approved using traditional late assessment TOC  
915 endpoints are suitable to use as comparators in future trials (Spellberg 2011). As discussed  
916 below, some justification for this is that traditional late assessment TOC endpoints have  
917 always implicitly included a requirement for an early response, albeit not necessarily in a  
918 formal manner.
- 919
- 920 c) ***Recent pharmacometric analyses show a correlation between drug exposure and TOC***  
921 ***endpoints.*** A recent presented observation (Ambrose 2011; European Medicines Agency  
922 2011) is that pharmacometric exposure-response analyses demonstrate a correlation of drug  
923 exposure with traditional clinical and microbiological endpoints.
- 924 i) Arguments in favor of the plausibility of these correlations include:
- 925 (1) The demonstrated relationships indicate that contemporary clinical endpoints (e.g.  
926 success or failure at the TOC) capture a measure of drug effect.
- 927 (2) These analyses produce estimates of treatment effect relative to placebo which are  
928 similar to estimates derived from other sources but that are derived using current  
929 data from modern studies and thereby could negate concerns of meeting the  
930 constancy assumption.
- 931 (3) The consistency of these observations (similar results can be shown for across  
932 both multiple indications [HAP, VAP, CAP, ABSSSI, and ABECB] and multiple  
933 antibiotic classes), the biological plausibility of the observations (drug effect  
934 should decline as exposure declines), the retention of the correlations when the  
935 analysis is controlled for age, severity of illness, or co-morbid disease, and the  
936 lack of an hypothesis regarding a host immune factor that would correspondingly  
937 alter drug exposure lend support to the need to consider carefully this approach.
- 938 (4) In particular, this approach offers the possibility of validating non-inferiority  
939 margins using modern trial designs and modern endpoints. Moreover,  
940 pharmacometric exposure-response analyses offer the possibility of linking early  
941 and contemporary late clinical endpoints.



- 942 ii) This approach, however, can also be critiqued:  
943 (1) Although these analyses are useful for identifying prognostic factors and  
944 generating hypotheses regarding plausible doses and schedules to be studied in  
945 properly conducted randomized trials, attempts at causal inferences from such  
946 analyses are biased due to confounding between treatment effects and prognostic  
947 patient characteristics.  
948 (2) Specifically, it is not sufficient that exposure or organisms may be randomly  
949 assigned, since host factors are not randomly assigned and these latter factors  
950 cannot be adequately accounted for by matching. People with differing  
951 concentrations or minimum inhibitory concentrations can differ on other factors  
952 that affect outcome, like age, severity of illness, co-morbid disease, or many other  
953 covariates, and most of these are unidentified or unrecorded. Inherent differences  
954 in such patient characteristics are sufficiently influential to lead to substantial  
955 differences in concentrations; therefore it is likely that these inherent differences  
956 are also meaningfully predictive of the outcome measures.  
957 (3) The consistency of results across settings may thus be explained by consistency of  
958 this same bias across those settings.  
959
- 960 d) **Early time points are already part of the traditional late assessment TOC outcome.** An  
961 early measure of response is included in all clinical trials, but the timing and formality of this  
962 evaluation may differ from trial to trial and there is not a systematic requirement for  
963 investigators to make a final assessment at this time point. If improvement is not apparent at  
964 Day 3 or 4, the patient is generally withdrawn from study medication and the response  
965 defined as a failure for effectiveness analyses. These outcomes are carried forward for  
966 purposes of analyses at later time points. In some trials, this early assessment has been  
967 entirely informal and is captured only by noting whether the physician and patient continued  
968 the randomized therapy. In other trials, a formal recording a decision to continue has been  
969 taken. A systematic analysis of early time points with clear definitions of outcomes would  
970 help clarify the analysis of trial results. A great strength of the work presented here is that it  
971 provides a basis for documenting the reasoning that goes into the decision to continue or  
972 discontinue therapy at an early time point. Early and later time point assessments are not  
973 mutually exclusive and can both be measured in the setting of clinical trials.  
974
- 975 e) **Later endpoints provide a key overall perspective.** While all team members agreed that early  
976 measurement provided important information on drug effects, some members of the Project  
977 Team believed that the primary outcome measure should be assessed at the EOT or beyond.  
978 The suggestion to use a later primary endpoint included these concerns:  
979 i) Overall clinical cure at a late time point following EOT is important to evaluate durability  
980 of response and should be noted in the product labeling. Given that this measure thus  
981 takes on the role of being the principal measure that is relevant to the use of a drug, it  
982 could be argued that this measure best meets the ICH E9 (Section 2.2.2) test that: “The  
983 primary variable (‘target’ variable, primary endpoint) should be the variable capable of  
984 providing the most clinically relevant and convincing evidence directly related to the  
985 primary objective of the trial.”  
986 ii) Use of the early endpoint as the primary study endpoint has not to date been specifically  
987 endorsed by other regulatory agencies. Global trial design harmonization is an important

988 goal and the full implications of the use of dual statistical analysis plans have yet to be  
989 understood by the community.

990 iii) As an example of a specific alternative approach, an overall endpoint which required both  
991 success at the early endpoint based on the rules proposed below (see Section 3) AND  
992 success at a later overall time such as at a typical TOC time point (preferably assessed  
993 using a direct measure of how a patient feels, functions or survives, lack of requirement  
994 for other therapy, lack of complications, etc.) could be considered to (i) incorporate the  
995 known effect size, (ii) capture the entire pattern of response, and (iii) address the concern  
996 that success rates inevitably rise over time such that even placebo-treated patients recover  
997 (or have died). If the effect size relative to placebo is sufficiently large for the early  
998 endpoint, the small number of patients who subsequently convert from success at the  
999 early endpoint to failure at the late endpoint (e.g., <5% in the tigecycline analysis) still  
1000 supports a large effect size (**Figure 3**). This idea follows naturally from the critique of the  
1001 traditional TOC endpoint discussed in Section 1.1 of this document and mimics the  
1002 standard clinical (and clinical trial) practice of using a patient's early response to  
1003 determine if therapy is adequate and suggests a connection between the demonstration of  
1004 the ability of standard trial designs to detect inadequate drugs or exposures (see above).  
1005 Combining the strength of a well-defined and objective early measure with the clinical  
1006 relevance of the overall endpoint offers a potentially useful alternate option to the  
1007 primary assessment at the time of the early endpoint. For example, such an approach  
1008 might support international harmonization.

1010 **Figure 3.** Estimating a late  
1011 treatment effect using the  
1012 estimate for an early treatment  
1013 effect. If there is a large early  
1014 effect AND if success at the late  
1015 time (e.g., a typical TOC  
1016 timepoint) requires early success,  
1017 then a large treatment effect will  
1018 still be present. As an example,  
1019 the treatment effect at early times  
1020 (a) for CABP is > 70% (see early  
1021 sections of this document for data  
1022 from Osler 1910, Bullowa 1937,  
1023 Meakins 1939). In the data  
1024 discussed by the working group,  
1025 rates of discordance between the early endpoint and a late (TOC) clinical endpoint were <  
1026 5% (Section 2.1.3).

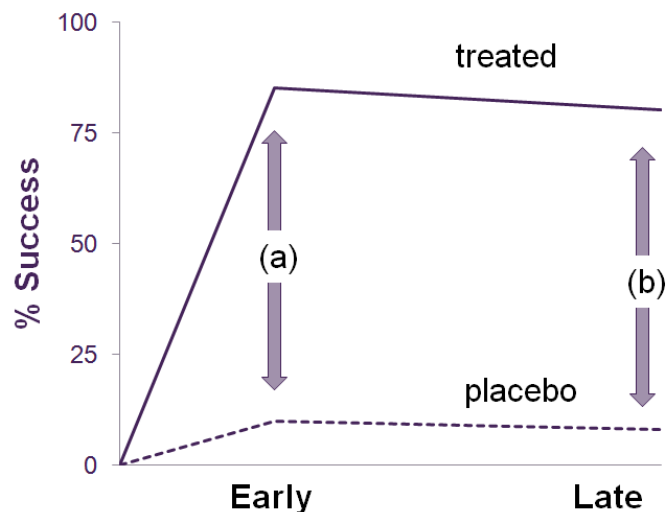

1027  
1028  
1029 f) **Time to response may provide useful insights.** Since clinicians often choose to change  
1030 therapy in the absences of response within two or three days, the early time point must have  
1031 some value in addition to later time points evaluating durability of response or other variables  
1032 such as relapse or adverse events. Time to response may also be an important measure but

1033 not one for which at present there are data to pose a hypothesis for a non-inferiority trial.  
1034 This is an approach that could be considered as additional data become available for analysis.  
1035  
1036

## 1037 **4 Conclusions**

1038  
1039 In the process outlined above various stakeholders including members from academia, industry  
1040 and government agencies proposed interim, bridging outcome measures for registrational trials in  
1041 the CABP indication.

1042  
1043 These interim outcome measures are based on an evidence-based analysis of the historical  
1044 literature that showed a treatment effect of antimicrobials in CABP based on symptom  
1045 improvement at Day 4 after the first dose of study drug. While other outcome measures are  
1046 relevant, there is insufficient evidence at present to base future non-inferiority trials solely on  
1047 those outcomes. These outcomes could be studied by testing superiority hypotheses in future  
1048 studies or possibly be based on new data such as the insights coming from recently presented  
1049 pharmacometric exposure-response analyses.

1050  
1051 The proposed early time point shows a substantial treatment effect for antimicrobials  
1052 (approximately 30%; Section 2.1.2 above), allowing assessment of the non-inferiority of active  
1053 agents at this time point. This large treatment effect (M1) provides a solid justification for  
1054 selection of an M2 on the basis of clinical reasoning.

1055  
1056 These interim outcome measures allows registrational studies to proceed while the Project Team  
1057 plans future qualitative and quantitative research studies to evaluate the relationship between  
1058 outcome measures in CABP and the operational characteristics of various measurement methods  
1059 and time points in assessing outcomes in CABP. These future studies are critical in addressing  
1060 knowledge gaps related to designing trials in CABP.

## 1061 **5 Supplemental Data**

### 1062 **5.1 The Course of Untreated Pneumonia**

1063

- 1064 1) The description provided by Osler in 1910 of the presentation of untreated pneumonia is  
1065 particularly detailed (Osler 1910)
- 1066 a) When seen on the second or third day, the picture in typical pneumonia is more  
1067 distinctive than any other acute disease.
  - 1068 b) The patient lies flat in bed, often on the affected side; the face is flushed, particularly one  
1069 or both cheeks; the breathing is hurried, accompanied often with a short expiratory grunt;  
1070 the alae nasi dilate with each inspiration; ... the eyes are bright; the expression anxious;  
1071 and there is a frequent short cough which makes the patient wince and hold his side.
  - 1072 c) The expectoration is blood-tinged and extremely tenacious.
  - 1073 d) The temperature may be 104° or 105°.
  - 1074 e) ...
  - 1075 f) After persisting for seven to ten days, the crisis occurs, and with a fall in the temperature  
1076 the patient passes from the condition of extreme distress and anxiety to one of  
1077 comparative comfort.
- 1078
- 1079 2) Osler provides these supplemental details in other parts of his review:
- 1080 a) Pain (pg. 174): “There is early a sharp, agonizing pain, generally referred to the region of  
1081 the nipple or lower axilla on the affected side, and much aggravated on deep inspiration  
1082 and coughing. It is absent in central pneumonia and much less frequent in apex  
1083 pneumonia.”
  - 1084 b) Dyspnea (pg. 174): “Dyspnea is an almost constant feature. Even early in the disease the  
1085 respirations may be 30 in the minute, and on the 2nd or 3rd day between 40 and 50. The  
1086 movements are shallow, evidently restrained, and if the patient is asked to draw a deep  
1087 breath he cries out with the pain.”
  - 1088 c) Cough (pg. 175): “This usually comes on with the pain in the side, and at first is dry,  
1089 hard, without any expectoration. Later it becomes very characteristic – frequent, short,  
1090 restrained, and associated with great pain in the side. In old persons, in drunkards, in the  
1091 terminal pneumonias, and sometimes in young children, there may be no cough. After the  
1092 crisis, the cough usually becomes much easier...”
  - 1093 d) Sputum (pg. 174): “At first it may be mucoid, but usually after 24h it comes blood-  
1094 tinged, viscid, and very tenacious. ... in 100 cases in my clinic, in 16 there was little or  
1095 no sputum, in 32 it was typically rusty, in 33 blood-streaked, in 3 cases very bloody.  
1096 After the crisis the quantity is variable, abundant in some cases, absent in others”
- 1097
- 1098 3) Similar to Osler, Bullowa’s 1937 description reinforces the sense of substantial morbidity but  
1099 also gives insight into a steady deterioration during the early course of disease:
- 1100 a) “After four or five days, ...  
1101 i) ...the patient who has become irritable and peevish, beings to “see things”, is  
1102 obstreperous, suspicious, and thinks he can take care of his own affairs. Under  
1103 hypnotics, he may doze or become lethargic.

- 1104           ii) By this time, the pain in his side has abated but the patient is distended and slumped  
1105           in bed.
- 1106           iii) He is cyanosed and breathes rapidly with effort.
- 1107           iv) His pulse becomes rapid (120 or more), he refuses food and his weakness and  
1108           emaciation are progressively severe
- 1109           v) He becomes incontinent of stool and urine.
- 1110        b) After eight or nine days, ...
- 1111           i) ... the temperature falls following a drenching sweat. The patient then convalesces  
1112           over several weeks, unless, after a few days there is an exacerbation of fever with the  
1113           onset of a suppurative complication.”
- 1114

1115 **5.2 Supplemental Details from the Tigecycline-Levofloxacin CABP Dataset**

1116

1117 **Table 6: Frequency of baseline symptoms in the patient cohort**

| Number of symptoms for which the score at baseline was Mild, Moderate, or Severe | TOC clinical response |           | Total      |
|----------------------------------------------------------------------------------|-----------------------|-----------|------------|
|                                                                                  | Cure                  | Failure   |            |
| 1                                                                                | 15                    | 4         | 19 (4%)    |
| 2                                                                                | 56                    | 9         | 65 (14%)   |
| 3                                                                                | 136                   | 21        | 157 (34%)  |
| 4                                                                                | 179                   | 37        | 216 (47%)  |
| <b>Total</b>                                                                     | <b>386</b>            | <b>71</b> | <b>457</b> |

1118

1119

1120 **Figure 4. Improvement in CAP symptoms in patients judged Cured at the TOC visit**

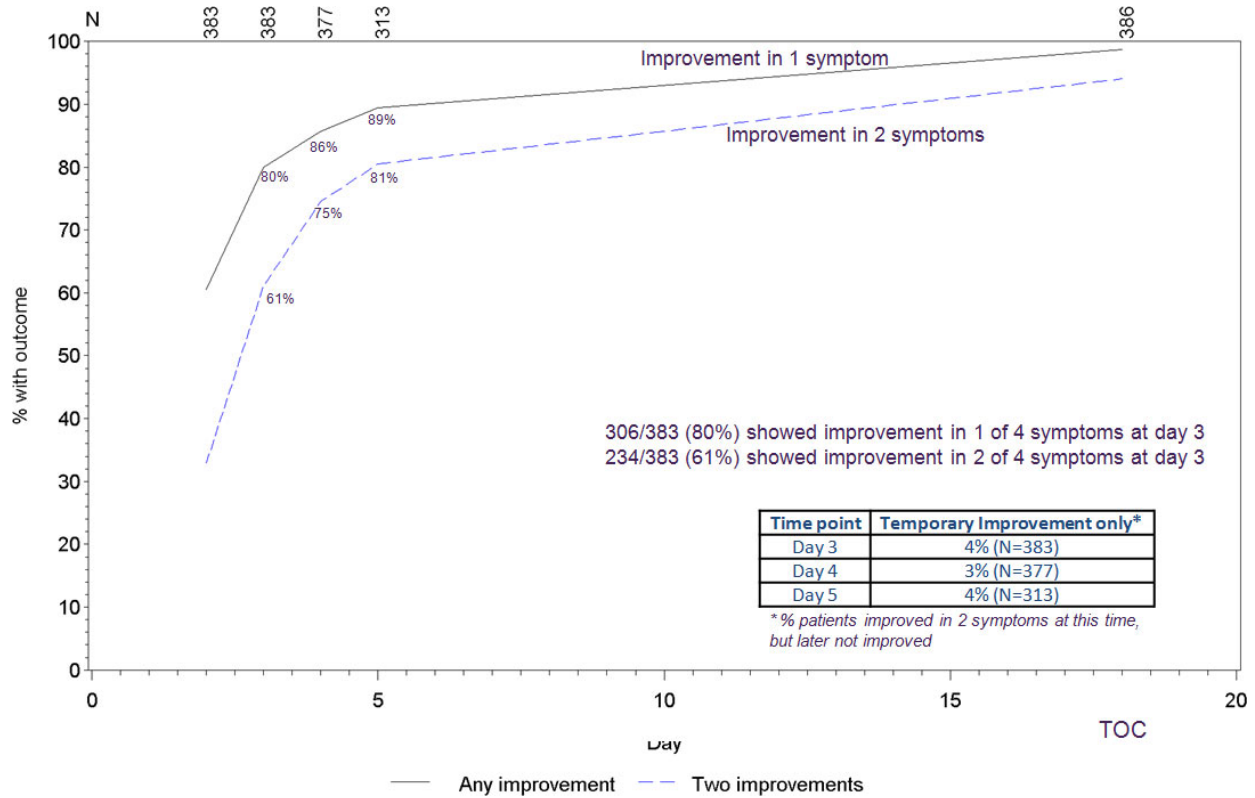

1121

1122

1123

1124

Temporary improvement rates use the total number of cures/total number of failures at TOC

1125 **Figure 5: Improvement in CAP symptoms in patients judged Failed at the TOC visit**

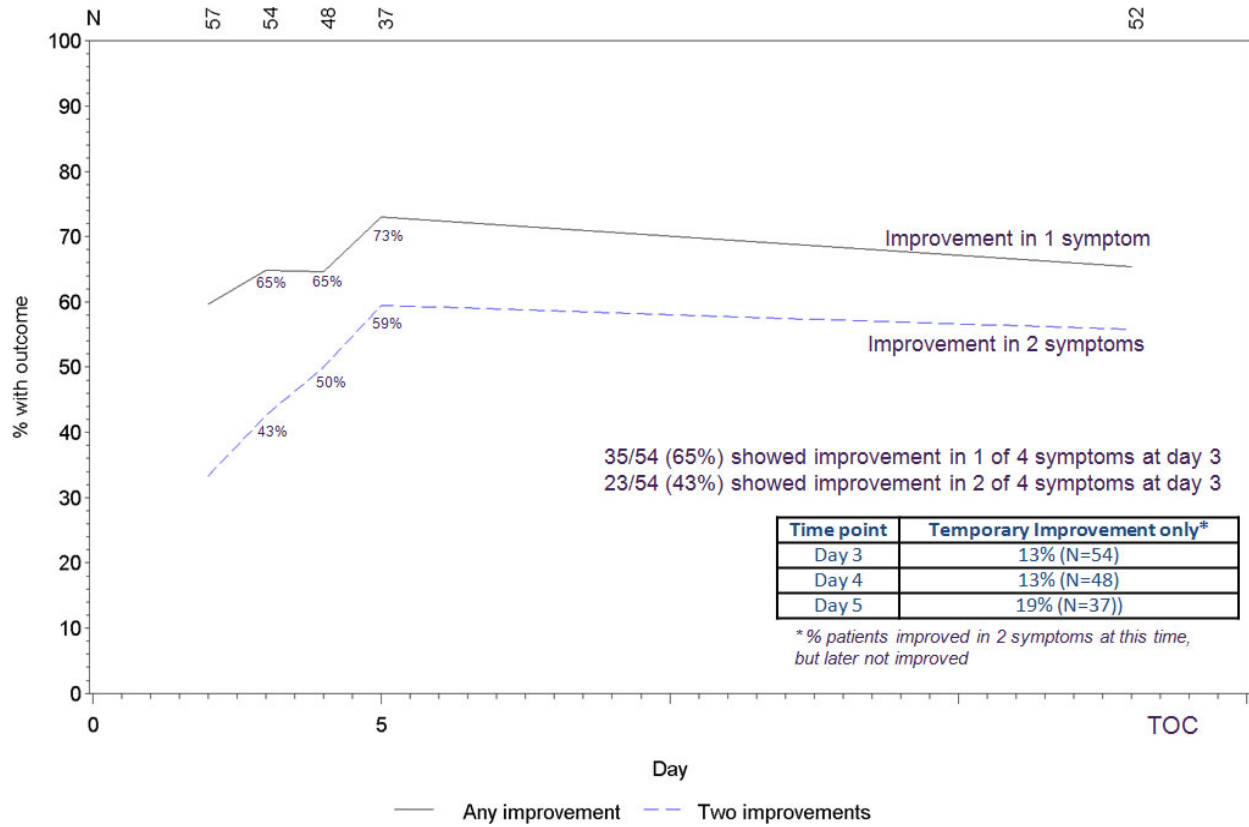

1126  
 1127  
 1128  
 1129  
 1130

Temporary improvement rates use the total number of cures/total number of failures at TOC



## 1131 **6 Project Team Members**

1132 The conclusions described within this document represent the work of the FNIH Biomarkers  
1133 Consortium Project “Developing Endpoints for Clinical Trials of Drugs for Treatment of Acute  
1134 Bacterial Skin and Skin Structure Infections and Community-Acquired Bacterial Pneumonia  
1135 (Phases 1 and 2)”.

- 1136 • Joseph Toerner, M.D., M.P.H. (Co-chair; FDA, non-voting)
- 1137 • George H. Talbot, M.D. (Co-chair; IDSA)
- 1138 • Jeff Alder, Ph.D. (Bayer)
- 1139 • Paul G. Ambrose, Pharm. D. (Institute for Clinical Pharmacodynamics; University of  
1140 Oxford)
- 1141 • Helen Boucher, M.D. (Tufts University)
- 1142 • John Bradley, M.D. (University of California, San Diego)
- 1143 • Laurie Burke, R.Ph, M.P.H. (FDA, non-voting)
- 1144 • Aaron Dane, Ph.D. (AstraZeneca);
- 1145 • Anita Das, Ph.D. (AxiStat)
- 1146 • Dennis Dixon, Ph.D. (NIH/NIAID)
- 1147 • Mike Dunne, M.D. (Durata Therapeutics)
- 1148 • Barry Eisenstein, M.D. (Cubist)
- 1149 • Thomas Fleming, Ph.D. (University of Washington)
- 1150 • Dean Follmann, Ph.D. (NIH/NIAID)
- 1151 • David Friedland, M.D. (Cerexa)
- 1152 • Ian Friedland, M.D. (Cubist)
- 1153 • Nickolas Kartsonis, M.D. (Merck)
- 1154 • Achim Kaufhold, M.D., Ph.D. (Basilea)
- 1155 • Scott Komo Dr.P.H. (FDA-observer, non-voting)
- 1156 • Mike Kurilla, M.D., Ph.D. (NIH/NIAID)
- 1157 • Kim Lindfield, Ph.D. (Cubist)
- 1158 • Lily Llorens, Ph.D. (Cerexa)
- 1159 • Susan Moriarty, M.D. (Cempra)
- 1160 • Shawnmarie Mayrand-Chung, J.D., Ph.D. (NIH)
- 1161 • Sumati Nambiar, M.D. (FDA-observer, non-voting)
- 1162 • David Oldach, M.D. (Cempra)
- 1163 • Gary J. Noel, M.D. (Paratek Pharmaceuticals)
- 1164 • Elektra Papadopoulos, M.D. (FDA, non-voting)
- 1165 • Roger Pomerantz, M.D. (Merck)
- 1166 • John Powers, M.D. (SAIC in support of NIH/NIAID)
- 1167 • Philippe Prokocimer, M.D. (Trius)
- 1168 • John Quinn, M.D. (Pfizer)
- 1169 • John H. Rex, M.D. (AstraZeneca)
- 1170 • Jennifer Schranz, M.D. (Cempra)
- 1171 • Judith A. Siuciak, Ph.D. (FNIH, non-voting)
- 1172 • William Stubbings, Ph.D. (Basilea)
- 1173 • David Wholley (FNIH, non-voting)

## 1174 7 References

- 1175  
1176 Ambrose, P. G. (2011). "Presentation on 21 April 2011 to the Project Team."  
1177 Boucher, H. W., G. H. Talbot, et al. (2009). "Bad Bugs, No Drugs: No ESCAPE! An Update  
1178 from the Infectious Diseases Society of America." *Clin Infect Dis* **48**(1): 1-12.  
1179 Bullowa, J. G. M. (1937). Chapter II. The course, symptoms and physical findings. The  
1180 management of pneumonias. New York, NY, Oxford University Press: 36-76.  
1181 el Moussaoui, R., B. C. Opmeer, et al. (2006). "Long-term symptom recovery and health-related  
1182 quality of life in patients with mild-to-moderate-severe community-acquired pneumonia."  
1183 *Chest* **130**: 1165-1172.  
1184 European Medicines Agency (2011). "Workshop on Antibacterials, Report of the Workshop,  
1185 document EMA/257650/2011, available online at  
1186 [http://www.ema.europa.eu/docs/en\\_GB/document\\_library/Report/2011/04/WC50010547](http://www.ema.europa.eu/docs/en_GB/document_library/Report/2011/04/WC500105473.pdf)  
1187 [3.pdf](http://www.ema.europa.eu/docs/en_GB/document_library/Report/2011/04/WC500105473.pdf)."  
1188 Finland, M., W. C. Spring, et al. (1940). "Immunological Studies on Patients with Pneumococccic  
1189 Pneumonia Treated with Sulfapyridine." *J Clin Invest* **19**(1): 179-99.  
1190 Fleming, T. R. and J. H. Powers (2008). "Issues in Noninferiority Trials: The Evidence in  
1191 Community- Acquired Pneumonia." *Clin Infect Dis* **47**: S108-S120.  
1192 Flippin, H. F., J. S. Lockwood, et al. (1939). "The treatment of pneumococccic pneumonia with  
1193 sulfapyridine." *JAMA-J Am Med Assn* **112**: 529-534.  
1194 Food and Drug Administration, Center for Drug Evaluation, (2009, March). "Guidance for  
1195 industry: Community-acquired bacterial pneumonia: Developing drugs for treatment."  
1196 US Dept HHS, FDA, CDER Available online at  
1197 [http://www.fda.gov/Drugs/GuidanceComplianceRegulatoryInformation/Guidances/](http://www.fda.gov/Drugs/GuidanceComplianceRegulatoryInformation/Guidances/default.htm)  
1198 [default.htm](http://www.fda.gov/Drugs/GuidanceComplianceRegulatoryInformation/Guidances/default.htm).  
1199 Food and Drug Administration, Center for Drug Evaluation, (2010). "Guidance for industry:  
1200 Non-inferiority clinical trials." US Dept HHS, FDA, CDER and CBER Available online  
1201 at  
1202 [http://www.fda.gov/Drugs/GuidanceComplianceRegulatoryInformation/Guidances/](http://www.fda.gov/Drugs/GuidanceComplianceRegulatoryInformation/Guidances/default.htm)  
1203 [default.htm](http://www.fda.gov/Drugs/GuidanceComplianceRegulatoryInformation/Guidances/default.htm).  
1204 Mandell, L. A., R. G. Wunderink, et al. (2007). "Infectious Diseases Society of  
1205 America/American Thoracic Society consensus guidelines on the management of  
1206 community-acquired pneumonia in adults." *Clin Infect Dis* **44 Suppl 2**: S27-72.  
1207 Meakins, J. C. and F. R. Hanson (1939). "The treatment of pneumococccic pneumonia with  
1208 sulfapyridine." *Can Med Assoc J* **40**: 333-6.  
1209 Metlay, J. P., S. J. Atlas, et al. (1998). "Time course of symptom resolution in patients with  
1210 community-acquird pneumonia." *Resp Med* **92**: 1137-42.  
1211 Metlay, J. P., M. J. Fine, et al. (1997). "Measuring symptomatic and functional recovery in  
1212 patients with community-acquired pneumonia." *J Gen Intern Med* **12**(7): 423-30.  
1213 Micheel, C., J. Ball, et al., Eds. (2010). Evaluation of biomarkers and surrogate endpoints in  
1214 chronic disease. Washington, DC, National Academies Press.  
1215 Ochoa-Gondar, O., A. Vila-Corcoles, et al. (2008). "The burden of community-acquired  
1216 pneumonia in the elderly: the Spanish EVAN-65 study." *BMC Public Health* **8**: 222.  
1217 Osler, W. (1910). Specific infectious diseases: Lobar pneumonia. The Principles and Practice of  
1218 Medicine. New York, D. Appleton and Company: 164-192.

1219 Pertel, P. E., P. Bernardo, et al. (2008). "Effects of prior effective therapy on the efficacy of  
1220 daptomycin and ceftriaxone for the treatment of community-acquired pneumonia." Clin  
1221 Infect Dis **46**(8): 1142-1151.

1222 Petersdorf, R. G., L. E. Cluff, et al. (1957). "Pneumococcal pneumonia treated with penicillin  
1223 and aspirin." Bull Johns Hopkins Hosp **101**(1): 1-12.

1224 Spellberg, B. (2011). "The tribulations of trials for antibacterial drugs." Clin Invest (in press).

1225 Spellberg, B., T. R. Fleming, et al. (2008). "Executive Summary: Workshop on Issues in the  
1226 Design and Conduct of Clinical Trials of Antibacterial Drugs in the Treatment of  
1227 Community-Acquired Pneumonia." Clin Infect Dis **47**: S105-S107.

1228 Spellberg, B., G. H. Talbot, et al. (2008). "Position Paper: Recommended Design Features of  
1229 Future Clinical Trials of Antibacterial Agents for Community-Acquired Pneumonia."  
1230 Clin Infect Dis **47**: S249-S265.

1231 Tanaseanu, C., C. Bergallo, et al. (2008). "Integrated results of 2 phase 3 studies comparing  
1232 tigecycline and levofloxacin in community-acquired pneumonia." Diagn Microbiol Infect  
1233 Dis **61**(3): 329-38.

1234 Tanaseanu, C., S. Milutinovic, et al. (2009). "Efficacy and safety of tigecycline versus  
1235 levofloxacin for community-acquired pneumonia." BMC Pulm Med **9**: 44.

1236 Wilson, A. T., H. A. Spreen, et al. (1939). "Sulfapyridine in the Treatment of Pneumonia in  
1237 Infancy and Childhood." JAMA **112**: 1435-1439.

1238

1239
